# Supplementary material for: Molecular dissection of human Argonaute proteins by DNA shuffling
Source: Springer Nature journal article supplement (doi:10.1038/nsmb.2607), 2013-06-09
Supplement: 41594_2013_BFnsmb2607_MOESM25_ESM.pdf [file 41594_2013_BFnsmb2607_MOESM25_ESM.pdf]

## Supplementary Information

# Molecular dissection of human Argonaute proteins using DNA shuffling

Nina Schürmann<sup>1</sup>, Leonardo G. Trabuco<sup>2</sup>, Christian Bender<sup>3</sup>, Robert B. Russell<sup>2</sup>, and Dirk Grimm<sup>1</sup>

<sup>1</sup>Heidelberg University Hospital, Cluster of Excellence CellNetworks, Department of Infectious Diseases, Virology, D-69120 Heidelberg, Germany

<sup>2</sup>Cluster of Excellence CellNetworks, Heidelberg University, D-69120 Heidelberg, Germany

<sup>3</sup>TRON - Translational Oncology at the University Medical Center of the Johannes Gutenberg University, D-55131 Mainz, Germany

Corresponding author: Dirk Grimm, [dirk.grimm@bioquant.uni-heidelberg.de](mailto:dirk.grimm@bioquant.uni-heidelberg.de)

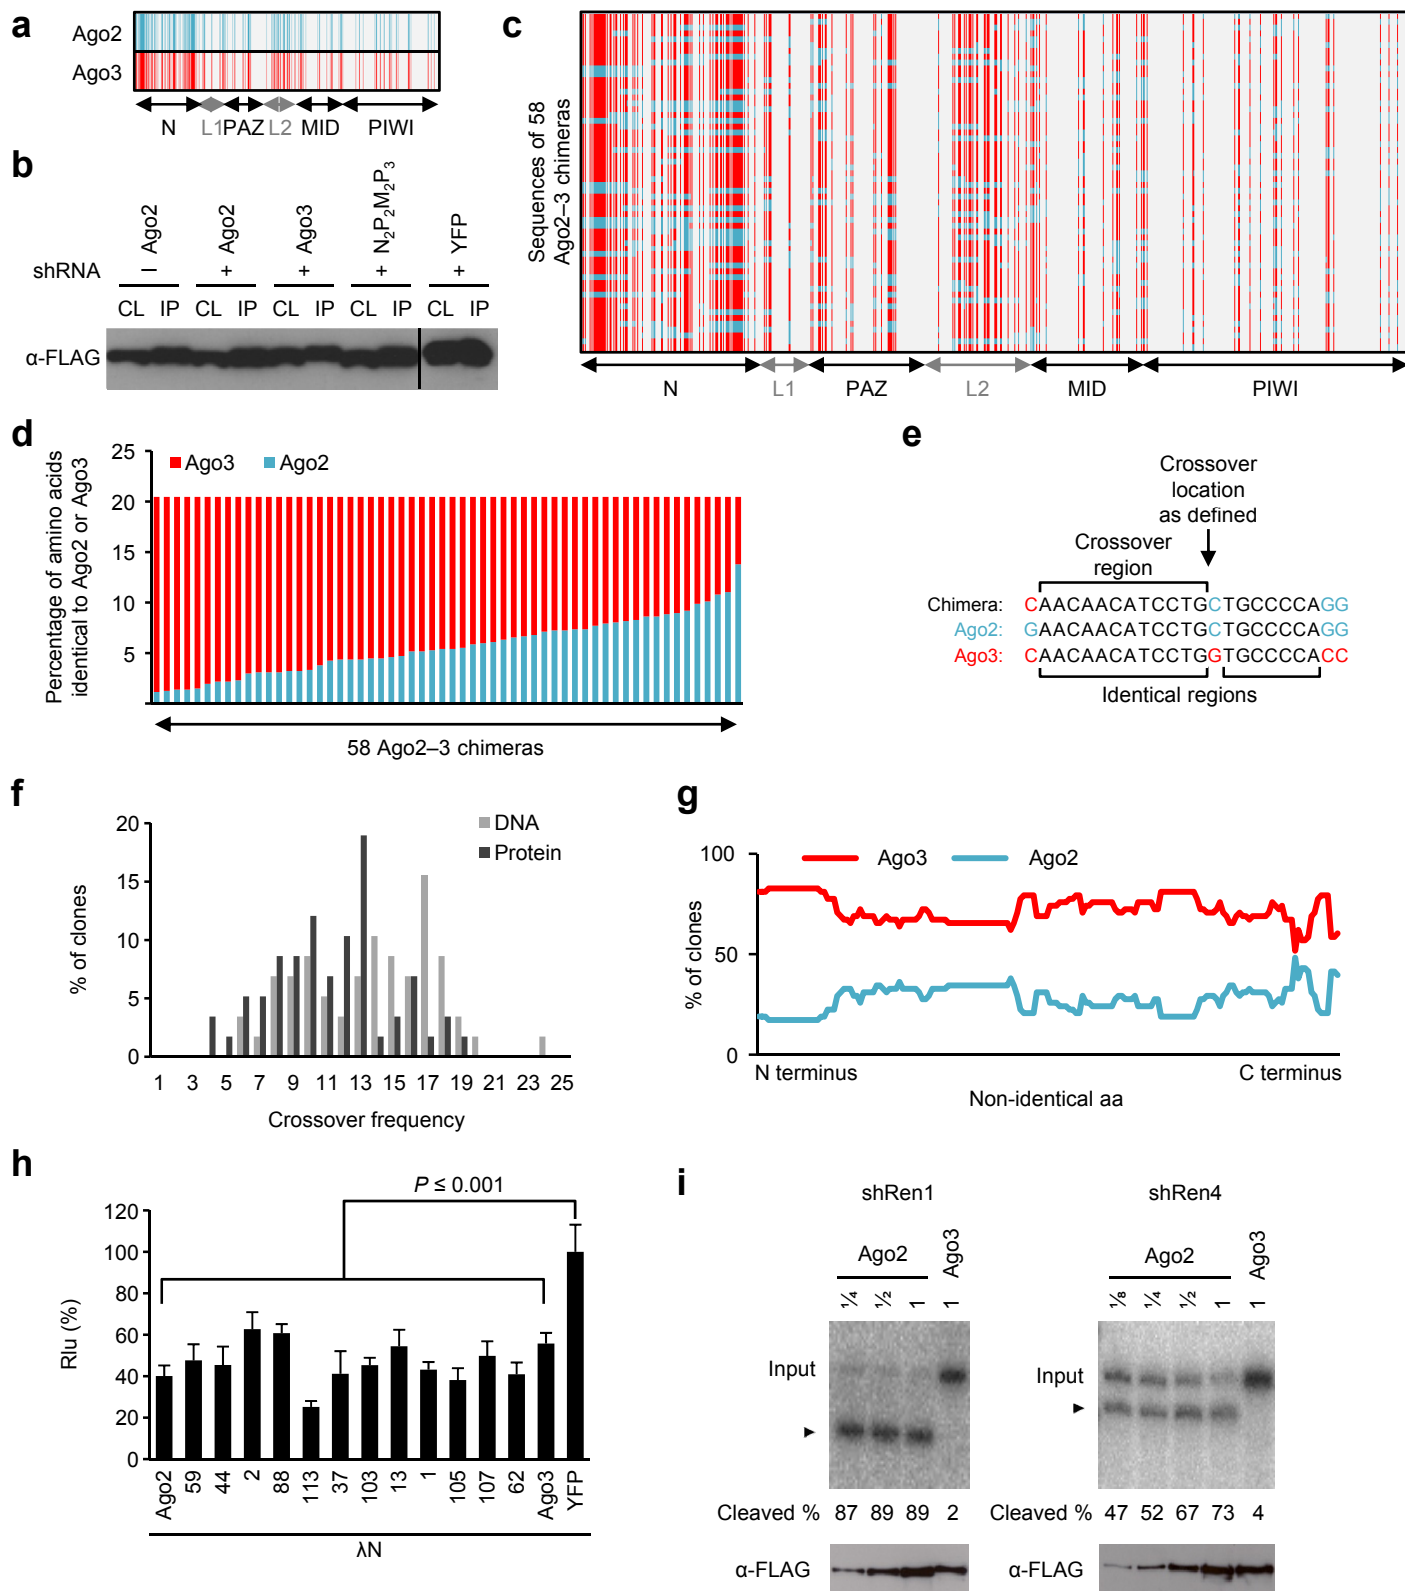

**Supplementary Fig. 1** Additional characterization and validation of Ago2-3 constructs.

(a) Schematic alignment of human Ago2 and Ago3 proteins. Blue regions are unique to Ago2, and red to Ago3; gray are identical in both. (b) Western blot analysis of immunoprecipitated Ago proteins used for the RISC cleavage assay in Fig. 1a. Samples were taken before (cell lysate, CL) or after immunoprecipitation (IP). (c) Alignment (type assignment generated via Salanto) of 58 randomly chosen clones (horizontal bars, one each) after Ago2-3 DFS. Color code as in a. (d) Percentage of Ago2- or Ago3-derived amino acids in 58 sequenced Ago2-3 chimeras (calculated by the Salanto software). For better visualization, only residues unique to one of the two parents (21.2% of the total proteins) were included. (e) Representative Ago2-3 crossover event, defined as the first nucleotide distinct from the preceding reference sequence in chimera alignments to the two parents. (f) Salanto-based analysis of crossover frequencies in the 58 chimeric Ago2-3 clones from c on DNA and protein level. Note that Salanto follows a parsimonious rationale according to which it tries to minimize the number of crossovers in the chimeric sequence. (g) Frequency of Ago2- or Ago3-derived amino acids in the 58 chimeric Ago2-3 clones from c at every position where the two parental proteins differ from each other. (h) Tethering assay of  $\lambda$ N-fused Ago constructs (see Fig. 4 for experimental details). Rlu, relative light units.  $P$  values were determined by Student's  $t$ -test ( $n=3$ ). (i) Pilot experiment to assess the robustness of the RISC cleavage assays, using various amounts of Ago-IP input levels ( $1/8$ ,  $1/4$ ,  $1/2$  or entire IP) and two different shRens. Western blots visualizing the range of Ago protein input levels in the corresponding samples are shown below. As indicated by the numbers, even an 8-fold variation in Ago input only translated into minor quantitative effects (26% at most) on target mRNA slicing. Notably, in all RISC cleavage assays in this paper, the experimental variation of Ago input levels was less than 8-fold.

## Supplementary Figure 1 Grimm

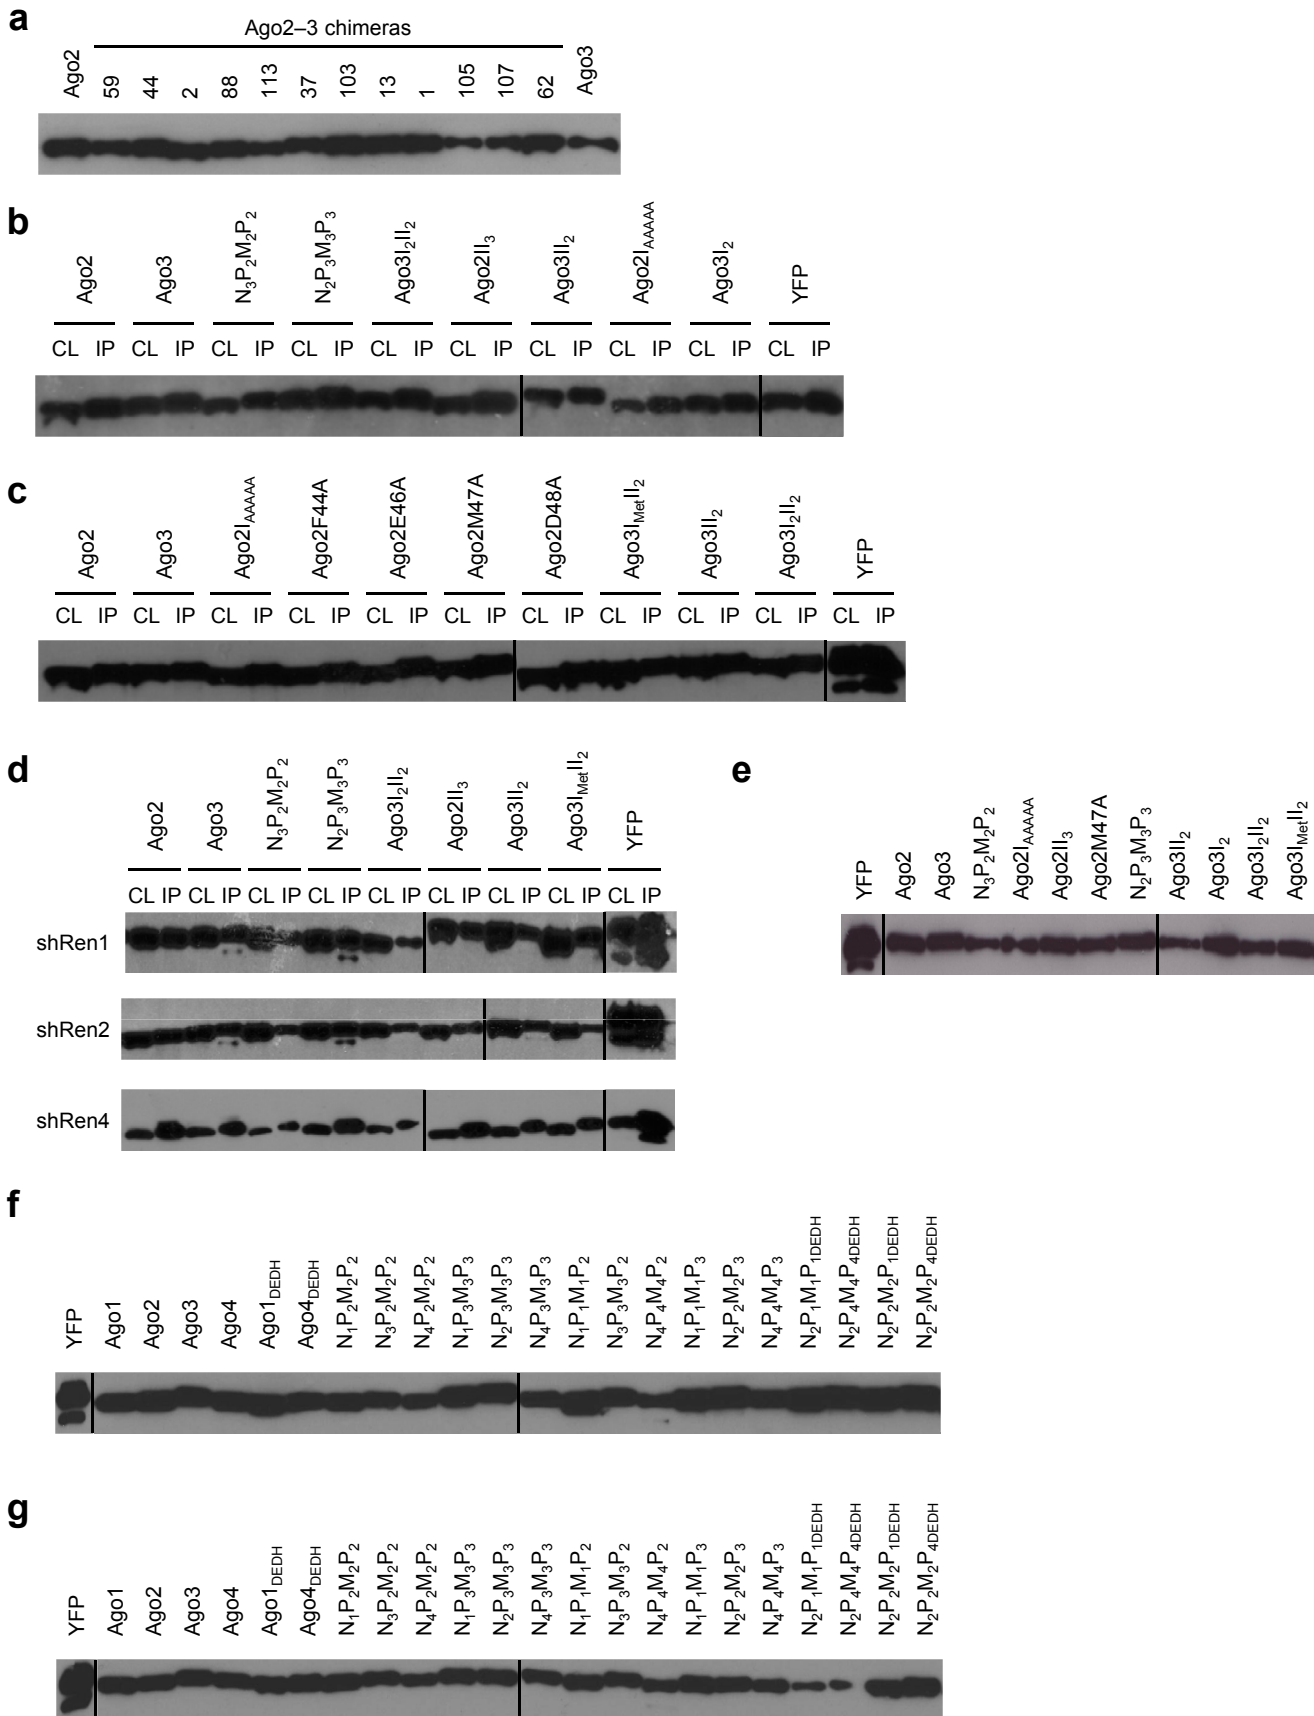

**Supplementary Fig. 2** Western blot analyses of immunoprecipitated Ago proteins used for RISC cleavage assays and Northern blotting (loading controls).

Samples were taken before (cell lysate, CL) or after immunoprecipitation (IP). (a) IP samples from RISC cleavage assay in Fig. 1e. (b) IP and CL samples from RISC cleavage assay in Fig. 2b and Northern blot in Fig. 2c. (c) IP and CL samples from RISC cleavage assay in Supplementary Fig. 3b and Northern blot in Supplementary Fig. 3c. (d) IP and CL samples from RISC cleavage assay in Supplementary Fig. 3d and Northern blot in Fig. 2d. (e) IP samples from RISC cleavage assay in Fig. 2f and Northern blot in Fig. 2g. (f) IP samples from RISC cleavage assay in Fig. 4c and Northern blot in Supplementary Fig. 6a. (g) IP samples from RISC cleavage assay in Fig. 4d and Northern blot in Supplementary Fig. 6b.

## Supplementary Figure 2 Grimm

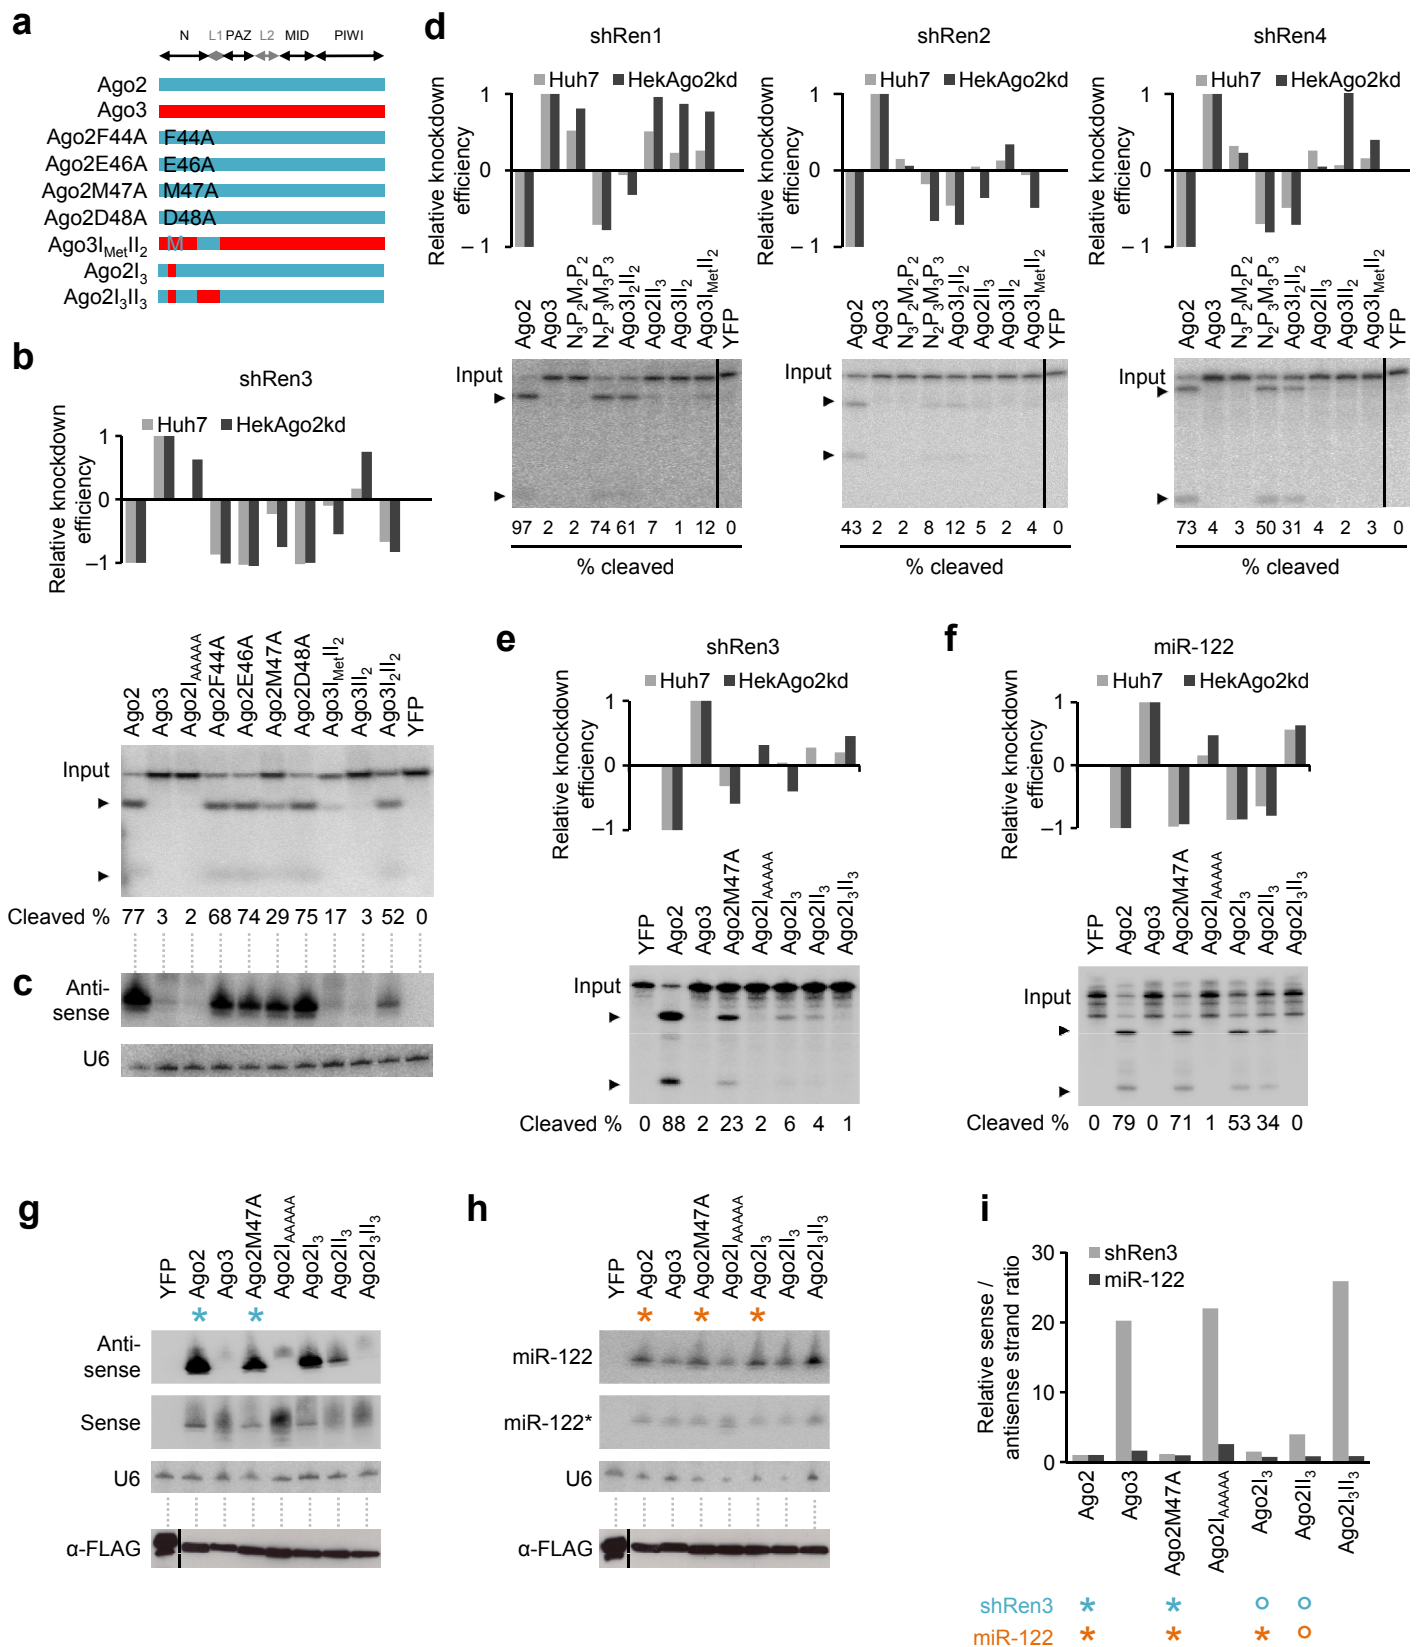

**Supplementary Fig. 3** Cooperative action of motifs I and II for small RNA duplex activation and target cleavage.

(a) Schemes depicting Ago2–3 mutants (color-coded according to wildtypes on top). (b) The shown mutants were tested in luciferase knockdown experiments (top) and RISC cleavage assays (bottom) using shRen3 as RNAi trigger. (c) Co-immunoprecipitated small RNAs (same samples as in b (bottom)) were analyzed by Northern blotting using a probe against the shRen3 antisense strand. (d–f) The indicated mutants were analyzed akin to b, using the shown different shRNAs or miR-122, respectively. (g,h) Northern blot analysis of small RNAs in IP samples (same as in e,f) using probes against the shRen3 antisense or sense strand (g), or against miR-122 or miR-122\* (h). Comparable protein input levels for e–h were validated by Western blotting (bottom). U6 small nuclear RNA signals (from naive RNA spiked in before RNA extraction) served as loading control in all Northern blots. Blue (shRen3) or orange (miR-122) asterisks: high slicer activity; blue (shRen3) or orange (miR-122) circles: intermediate slicer activity. (i) Northern blot signals from g,h were quantified and ratios between sense / antisense strand or miR-122\* / miR-122 were calculated relative to Ago2 (set to 1). See g,h for symbols.

## Supplementary Figure 3 Grimm

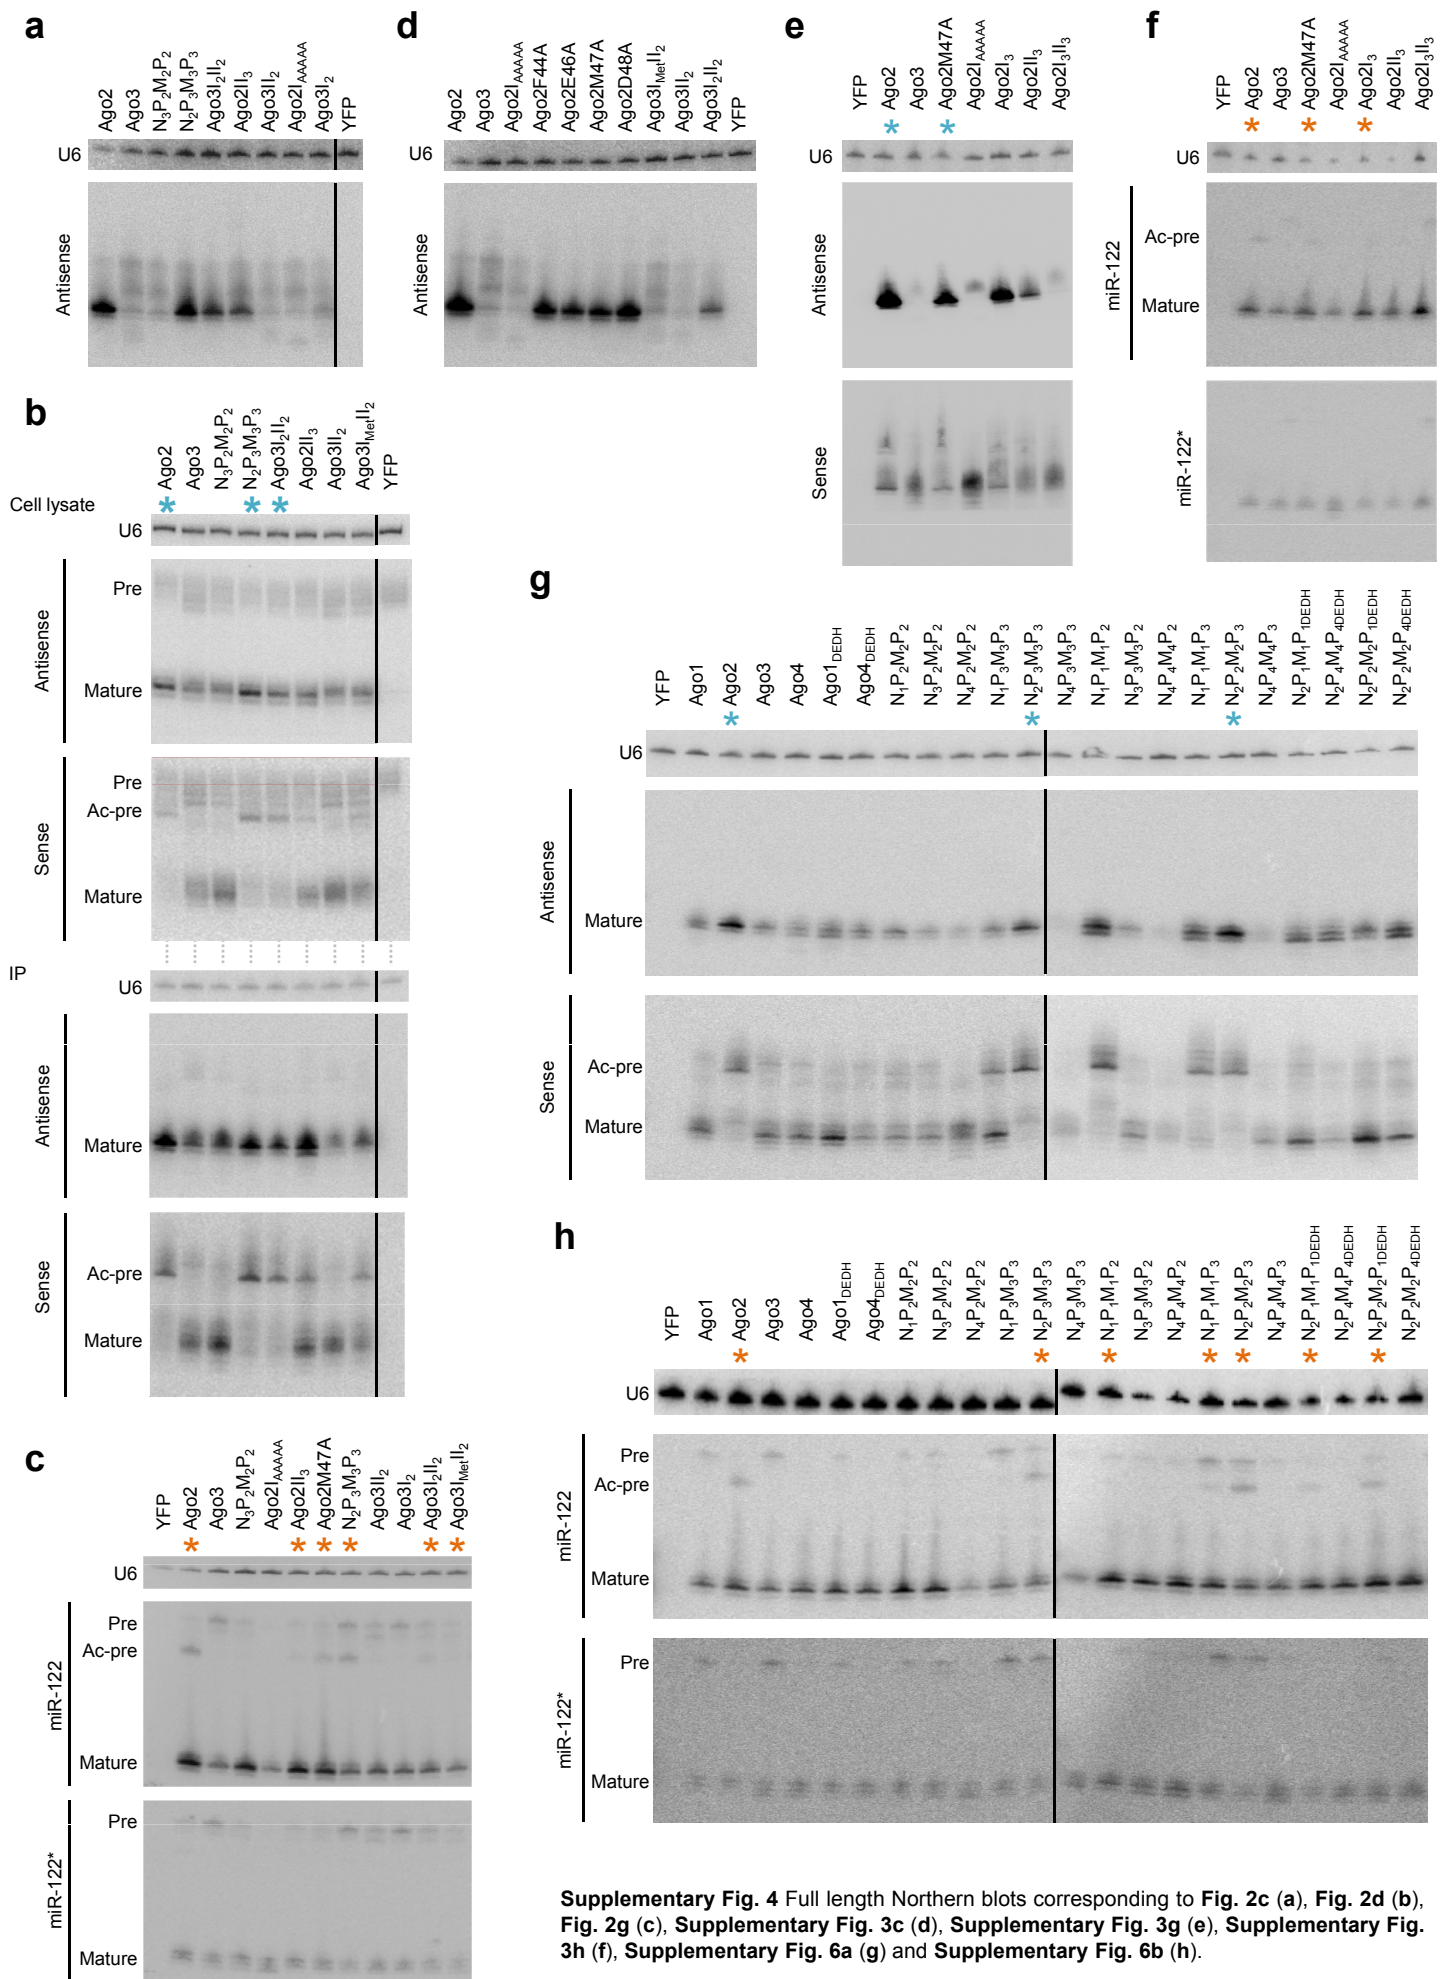

## Supplementary Figure 4 Grimm

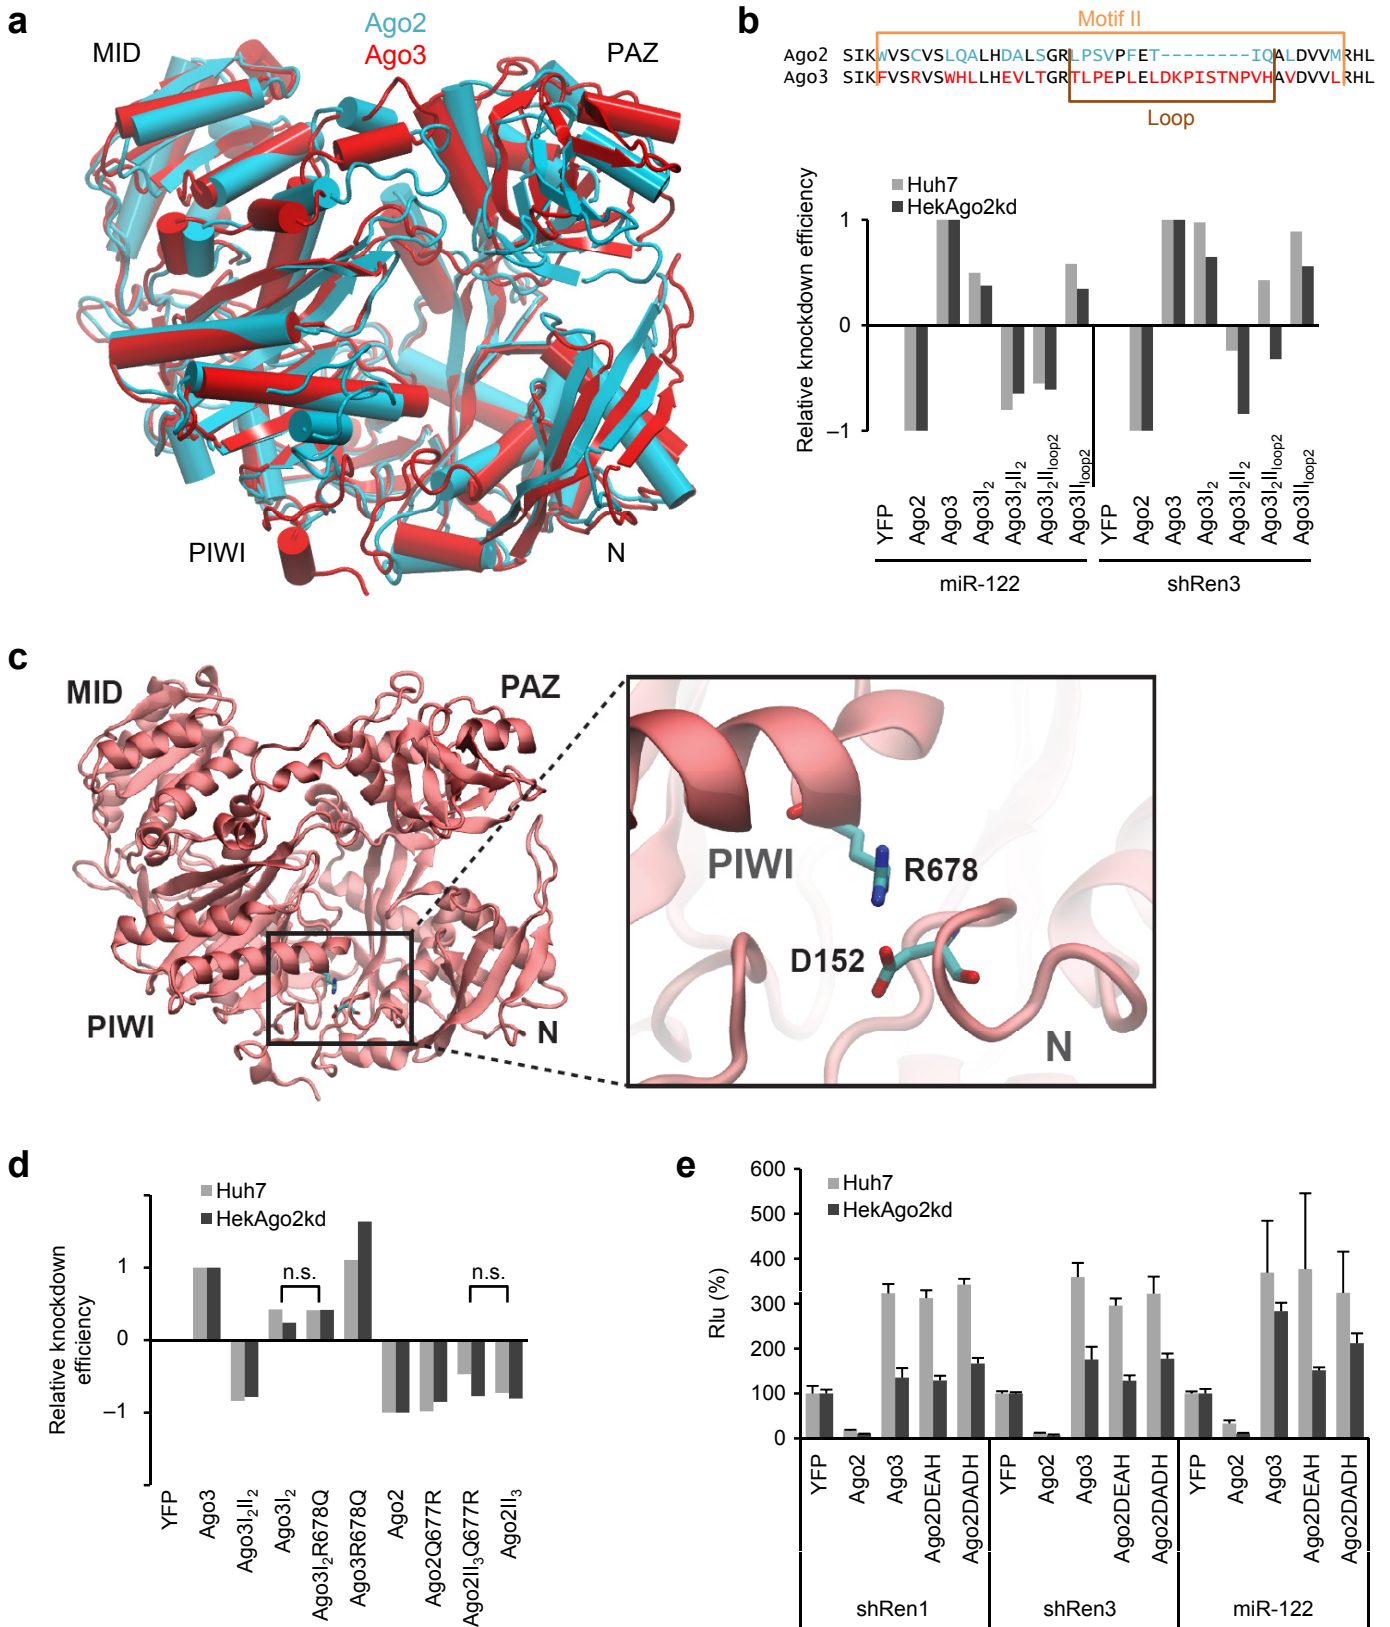

**Supplementary Fig. 5** Additional theoretical and experimental dissection of critical elements in Ago2–3.

(a) Superposition of Ago2–3 homology models. (b) Analysis of Ago3 mutants harboring complete motif II or only the loop structure from Ago2 (see alignment on top) in luciferase assays with either miR-122 or shRen3 (see Fig. 1 for experimental details). Note that motif II in Ago2 contains two helices linked by a short loop, whereas Ago3 has to accommodate 8 additional amino acids within this region (see also Fig. 3 and Supplementary Fig. 7b), which, according to our Ago3 model, partly occupy and obstruct the RNA channel. (c) Salt bridge potentially connecting Ago3 N and PIWI domains, which cannot occur in Ago2 according to our homology models. Also note that R678 is in the vicinity of D670 (not shown), which belongs to the catalytic tetrad. Interaction of R678 with D152 might therefore prevent D670 from efficiently joining the catalytic site in Ago3. Interestingly, R678 is only present in Ago3, potentially explaining the residual activity of mutant Ago2I<sub>3</sub>. (d) miR-122-based luciferase knockdown experiments with Ago2–3 mutants in which we either aimed to destroy (Ago3I<sub>2</sub>R678Q) or reconstitute (Ago2I<sub>3</sub>Q677R) the potential salt bridge (Ago3R678Q, Ago2Q677R served as controls). No significant changes relative to Ago3I<sub>2</sub> (for Ago3I<sub>2</sub>R678Q) or Ago2I<sub>3</sub> (Ago2I<sub>3</sub>Q677R) were observed. However, the correct formation of this putative salt bridge might depend on adjacent residues and structures that are not captured by these mutants. n.s., non-significant. (e) Analysis of the performance of the Ago2E637A mutant with two perfectly (shRen1 and shRen3) and one imperfectly duplexed small RNA triggers (miR-122) in luciferase knockdown experiments (data were normalized to the YFP control).

Supplementary Figure 5 Grimm

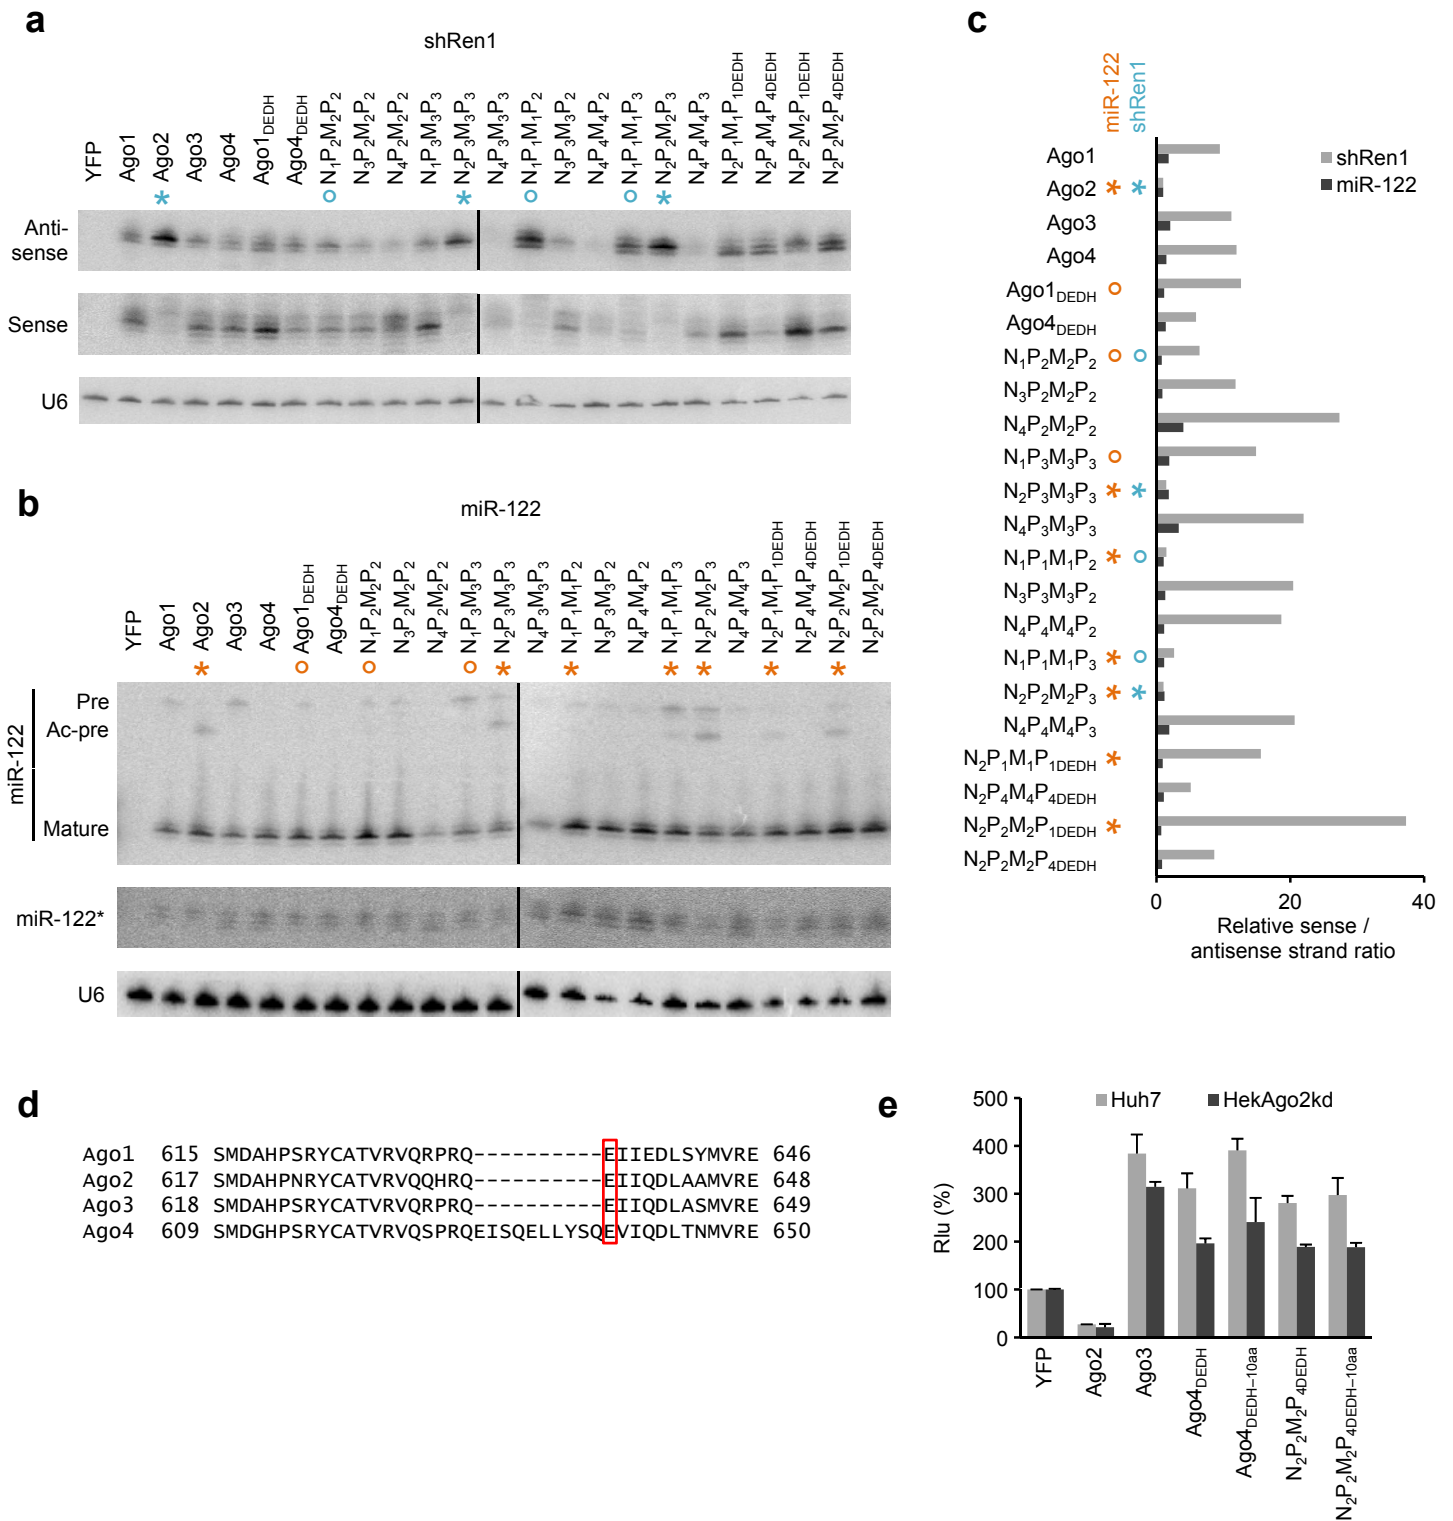

**Supplementary Fig. 6** Functional analysis of Ago1–4 hybrids.

(a,b) Immunoprecipitated Ago complexes from Hek293T cells co-transfected with YFP or Ago and shRen1 (a) or miR-122 (b) were analyzed by Northern blotting (same samples as used in the RISC cleavage assays in Fig. 4 c,d). See Fig. 2 for experimental details. (c) Northern blot signals from a,b were quantified and ratios between sense and antisense strands, or miR-122\* / miR-122, were calculated (relative to Ago2, set to 1). Blue (shRen3) or orange (miR-122) asterisks: high slicer activity; blue (shRen3) or orange (miR-122) circles: intermediate slicer activity. (d) Partial alignment of human Ago1–4 PIWI domains around the Ago2 E637 residue (red frame) which is fully conserved in all four human Agos. Evident is an N-terminal 10 aa insertion in Ago4 which we deleted to test whether it interferes with the function of the glutamate (see e for results). (e) Knockdown assays (co-transfection of miR-122-tagged *Renilla* luciferase, miR-122 expression plasmid as well as the indicated Ago constructs) showed that deletion of the 10 aa insertion did not reconstitute slicing ability in Ago4, neither in the wildtype context (Ago4<sub>DEDH-10aa</sub>) nor after fusion of the altered Ago4 PIWI domain with the slicing-compatible N to MID domains from Ago2 (N<sub>2</sub>P<sub>2</sub>M<sub>2</sub>P<sub>4</sub><sub>DEDH-10aa</sub>). This suggests that other, as-of-yet unknown sequence/structure elements in Ago4 PIWI cause the distinctive slicing deficiency of this Ago family member.

Supplementary Figure 6 Grimm

a

|      |                                                                                      |    |
|------|--------------------------------------------------------------------------------------|----|
| Ago2 | MYSG-AGPALAPPAPPPP IQGYAFKPPPRDFGTSGRTIKLANFFEMD IPKID IYHYELD IKPEK CPRRVNREIVEH MV | 79 |
| 59   | MEIGSAGPAGAQP-----LLMVP RRP GYGTMGKPIKLLANCFQVE IPKIDVYLYEVD IKPKDCPRRVNREVDSMV      | 71 |
| 44   | MYSG-AGPALAPPAPPPP IQGYAFKPPPRDFGTSGRTIKLANFFEMD IPKID IYHYELD IKPKDCPRRVNREVDSMV    | 79 |
| 2    | MEIGSAGPAGAQP-----LLMVP RRP GYGTMGKPIKLLANCFQVE IPKIDVYLYEVD IKPKDCPRRVNREVDSMV      | 71 |
| 88   | MEIGSAGPAGAQP-----LLMVP RRP GYGTMGKPIKLLANCFQVE IPKIDVYLYEVD IKPKDCPRRVNREVDSMV      | 71 |
| 113  | MEIGSAGPAGAQP-----LLMVP RRP GYGTMGKPIKLLANCFQVE IPKIDVYLYEVD IKPKDCPRRVNREIVEH MV    | 71 |
| 37   | MEIGSAGPAGAQP-----LLMVP RRP DFGTSGRTIKLANFFEMD IPKID IYHYELD IKPEK CPRRVNREVDSMV     | 71 |
| 103  | MYSG-AGPALAPPAPPPP IQGYAFKPPPRDFGTSGRTIKLANFFEMD IPKID IYHYELD IKPEK CPRRVNREIVEH MV | 79 |
| 13   | MYSG-AGPALAPPAPPPP IQGYAFKPPPRDFGTSGRTIKLANFFEMD IPKID IYHYELD IKPEK CPRRVNREVDSMV   | 79 |
| 1    | MEIGSAGPAGAQP-----LLMVP RRP GYGTMGKPIKLLANCFQVE IPKIDVYLYEVD IKPKDCPRRVNREVDSMV      | 71 |
| 105  | MEIGSAGPAGAQP-----LLMVP RRP GYGTMGKPIKLLANCFQVE IPKIDVYLYEVD IKPKDCPRRVNREVDSMV      | 71 |
| 107  | MEIGSAGPAGAQP-----LLMVP RRP GYGTMGKPIKLLANCFQVE IPKIDVYLYEVD IKPKDCPRRVNREVDSMV      | 71 |
| 62   | MEIGSAGPAGAQP-----LLMVP RRP GYGTMGKPIKLLANCFQVE IPKIDVYLYEVD IKPKDCPRRVNREVDSMV      | 71 |
| Ago3 | MEIGSAGPAGAQP-----LLMVP RRP GYGTMGKPIKLLANCFQVE IPKIDVYLYEVD IKPKDCPRRVNREVDSMV      | 71 |

Motif I

N

|      |                                                                                       |     |
|------|---------------------------------------------------------------------------------------|-----|
| Ago2 | QHFKTQIFGDRKPVFDGRKNLYTAMPLP IGRDKVELEVTLPGEG-KDRIFKVS IKWVSCVSLQALHDALS GRLPSVFPFET  | 158 |
| 59   | QHFKVTIFGDRKPVFDGRKNLYTAMPLP IGRDKVELEVTLPGEG-KDRIFKVS IKWVSCVSLQALHDALS GRLPSVFPFET  | 150 |
| 44   | QHFKTQIFGDRKPVFDGRKNLYTAMPLP IGRDKVELEVTLPGEG-KDRIFKVS IKWVSCVSLQALHDALS GRLPSVFPFET  | 158 |
| 2    | QHFKVTIFGDRRPPVYDGKRSLYTAMPLP IGRDKVELEVTLPGEG-KDRIFKVS IKWVSCVSLQALHDALS GRLPSVFPFET | 150 |
| 88   | QHFKVTIFGDRRPPVYDGKRSLYTAMPLP IGRDKVELEVTLPGEG-KDRIFKVS IKWVSCVSLQALHDALS GRLPSVFPFET | 150 |
| 113  | QHFKVTIFGDRRPPVYDGKRSLYTANPLPVATTGVDL DVTLPGEGGKDRPFKVS IKFVSRVSWHLLHEVLTGR TLPEPEL   | 151 |
| 37   | QHFKVTIFGDRRPPVYDGKRSLYTANPLPVATTGVDL DVTLPGEGGKDRPFKVS IKFVSRVSWHLLHEVLTGR TLPEPEL   | 151 |
| 103  | QHFKTQIFGDRKPVFDGRKNLYTAMPLP VATTGVDL DVTLPGEGGKDRPFKVS IKFVSRVSWHLLHEVLTGR TLPEPEL   | 159 |
| 13   | QHFKVTIFGDRRPPVYDGKRSLYTANPLPVATTGVDL DVTLPGEGGKDRPFKVS IKFVSRVSWHLLHEVLTGR TLPEPEL   | 159 |
| 1    | QHFKVTIFGDRRPPVYDGKRSLYTANPLPVATTGVDL DVTLPGEGGKDRPFKVS IKFVSRVSWHLLHEVLTGR TLPEPEL   | 151 |
| 105  | QHFKTQIFGDRRPPVYDGKRSLYTANPLPVATTGVDL DVTLPGEGGKDRPFKVS IKFVSRVSWHLLHEVLTGR TLPEPEL   | 151 |
| 107  | QHFKVTIFGDRRPPVYDGKRSLYTANPLPVATTGVDL DVTLPGEGGKDRPFKVS IKFVSRVSWHLLHEVLTGR TLPEPEL   | 151 |
| 62   | QHFKTQIFGDRKPVFDGRKNLYTAMPLP VATTGVDL DVTLPGEGGKDRPFKVS IKFVSRVSWHLLHEVLTGR TLPEPEL   | 151 |
| Ago3 | QHFKVTIFGDRRPPVYDGKRSLYTANPLPVATTGVDL DVTLPGEGGKDRPFKVS IKFVSRVSWHLLHEVLTGR TLPEPEL   | 151 |

Motif II

L1

|      |                                                                                         |     |
|------|-----------------------------------------------------------------------------------------|-----|
| Ago2 | -----IQALDVVMRHLPSMRYTPVGRSFF TASEGCSNPLGGGREVWFGFHQSVRP SLWKMLNIDVSATAFYKAQPV          | 230 |
| 59   | -----IQALDVVMRHLPSMRYTPVGRSFF TAP EGYDHP LGGGREVWFGFHQSVRP AMWKMLNIDVSATAFYKAQPV        | 222 |
| 44   | -----IQALDVVMRHLPSMRYTPVGRSFF SAPEGYDHP LGGGREVWFGFHQSVRP AMWKMLNIDVSATAFYKAQPV         | 230 |
| 2    | -----IQALDVVLRHLPSMRYTPVGRSFF SAPEGYDHP LGGGREVWFGFHQSVRP AMWKMLNIDVSATAFYKAQPV         | 222 |
| 88   | -----IQALDVVMRHLPSMRYTPVGRSFF SAPEGYDHP LGGGREVWFGFHQSVRP AMWKMLNIDVSATAFYKAQPV         | 222 |
| 113  | -----IQALDVVMRHLPSMRYTPVGRSFF TASEGCSNPLGGGREVWFGFHQSVRP SLWKMLNIDVSATAFYKAQPV          | 222 |
| 37   | DKP ISTNPNVHADV D VVLRHLPSMRYTPVGRSFF SAPEGYDHP LGGGREVWFGFHQSVRP SLWKMLNIDVSATAFYKAQPV | 231 |
| 103  | DKP ISTNPNVHALDVVMRHLPSMRYTPVGRSFF SAPEGYDHP LGGGREVWFGFHQSVRP AMWKMLNIDVSATAFYKAQPV    | 239 |
| 13   | DKP ISTNPNVHADV D VVLRHLPSMRYTPVGRSFF SAPEGYDHP LGGGREVWFGFHQSVRP AMWKMLNIDVSATAFYKAQPV | 239 |
| 1    | DKP ISTNPNVHADV D VVLRHLPSMRYTPVGRSFF SAPEGYDHP LGGGREVWFGFHQSVRP AMWKMLNIDVSATAFYKAQPV | 231 |
| 105  | DKP ISTNPNVHADV D VVLRHLPSMRYTPVGRSFF SAPEGYDHP LGGGREVWFGFHQSVRP AMWKMLNIDVSATAFYKAQPV | 231 |
| 107  | DKP ISTNPNVHADV D VVLRHLPSMRYTPVGRSFF SAPEGYDHP LGGGREVWFGFHQSVRP AMWKMLNIDVSATAFYKAQPV | 231 |
| 62   | DKP ISTNPNVHADV D VVLRHLPSMRYTPVGRSFF SAPEGYDHP LGGGREVWFGFHQSVRP AMWKMLNIDVSATAFYKAQPV | 231 |
| Ago3 | DKP ISTNPNVHADV D VVLRHLPSMRYTPVGRSFF SAPEGYDHP LGGGREVWFGFHQSVRP AMWKMLNIDVSATAFYKAQPV | 231 |

PAZ

|      |                                                                                   |     |
|------|-----------------------------------------------------------------------------------|-----|
| Ago2 | IEFVCEVLD FKSIEEQKPLTDSQRVKFTKEIKGLKVEITHCGQMRRKYRVCN VTRRPASHQTFFLQLENGQTVECTVAQ | 310 |
| 59   | IQFMCEVLDIHNIDEQPRPLTDSHRVKFTKEIKGLKVEVTHCGTMRKRYRVCN VTRRPASHQTFFLQLENGQTVECTVAQ | 302 |
| 44   | IQFMCEVLDIHNIDEQPRPLTDSHRVKFTKEIKGLKVEVTHCGTMRKRYRVCN VTRRPASHQTFFLQLENGQTVECTVAQ | 310 |
| 2    | IQFMCEVLDIHNIDEQPRPLTDSHRVKFTKEIKGLKVEVTHCGTMRKRYRVCN VTRRPASHQTFFLQLENGQTVECTVAQ | 302 |
| 88   | IQFMCEVLDIHNIDEQPRPLTDSHRVKFTKEIKGLKVEVTHCGTMRKRYRVCN VTRRPASHQTFFLQLENGQTVECTVAQ | 302 |
| 113  | IQFMCEVLDIHNIDEQPRPLTDSHRVKFTKEIKGLKVEVTHCGTMRKRYRVCN VTRRPASHQTFFLQLENGQTVECTVAQ | 302 |
| 37   | IEFVCEVLDIHNIDEQPRPLTDSHRVKFTKEIKGLKVEVTHCGTMRKRYRVCN VTRRPASHQTFFLQLENGQTVECTVAQ | 311 |
| 103  | IQFMCEVLDIHNIDEQPRPLTDSHRVKFTKEIKGLKVEITHCGTMRKRYRVCN VTRRPASHQTFFLQLENGQTVECTVAQ | 319 |
| 13   | IQFMCEVLDIHNIDEQPRPLTDSQRVKFTKEIKGLKVEVTHCGTMRKRYRVCN VTRRPASHQTFFLQLENGQTVECTVAQ | 319 |
| 1    | IEFVCEVLD FKSIEEQKPLTDSHRVKFTKEIKGLKVEVTHCGTMRKRYRVCN VTRRPASHQTFFLQLENGQTVECTVAQ | 311 |
| 105  | IQFMCEVLDIHNIDEQPRPLTDSHRVKFTKEIKGLKVEVTHCGTMRKRYRVCN VTRRPASHQTFFLQLENGQTVECTVAQ | 311 |
| 107  | IQFMCEVLDIHNIDEQPRPLTDSHRVKFTKEIKGLKVEVTHCGTMRKRYRVCN VTRRPASHQTFFLQLENGQTVECTVAQ | 311 |
| 62   | IQFMCEVLDIHNIDEQPRPLTDSQRVKFTKEIKGLKVEVTHCGTMRKRYRVCN VTRRPASHQTFFLQLENGQTVECTVAQ | 311 |
| Ago3 | IQFMCEVLDIHNIDEQPRPLTDSHRVKFTKEIKGLKVEVTHCGTMRKRYRVCN VTRRPASHQTFFLQLENGQTVECTVAQ | 311 |

L2

|      |                                                                                   |     |
|------|-----------------------------------------------------------------------------------|-----|
| Ago2 | YFKDRHKLVLRYPHLPCLOVGGQE QKHTYLPLEVCNIVAGQRCIKKLDNQTSTMIRATARSAPDRQEEISKLMSASFNT  | 390 |
| 59   | YFREKYTLQLKYPHLPCLQVGGQE QKHTYLPLEVCNIVAGQRCIKKLDNQTSTMIRATARSAPDRQEEISRLVRSANYET | 382 |
| 44   | YFREKYTLQLKYPHLPCLQVGGQE QKHTYLPLEVCNIVAGQRCIKKLDNQTSTMIRATARSAPDRQEEISRLVRSANYET | 390 |
| 2    | YFREKYTLQLKYPHLPCLQVGGQE QKHTYLPLEVCNIVAGQRCIKKLDNQTSTMIRATARSAPDRQEEISRLVRSANYET | 382 |
| 88   | YFKDRHKLVLRYPHLPCLOVGGQE QKHTYLPLEVCNIVAGQRCIKKLDNQTSTMIRATARSAPDRQEEISRLVRSASFNT | 382 |
| 113  | YFKDRHKLVLRYPHLPCLOVGGQE QKHTYLPLEVCNIVAGQRCIKKLDNQTSTMIRATARSAPDRQEEISRLVRSANYET | 382 |
| 37   | YFREKYTLQLKYPHLPCLQVGGQE QKHTYLPLEVCNIVAGQRCIKKLDNQTSTMIRATARSAPDRQEEISRLVRSANYET | 391 |
| 103  | YFKDRHKLVLRYPHLPCLOVGGQE QKHTYLPLEVCNIVAGQRCIKKLDNQTSTMIRATARSAPDRQEEISRLVRSANYET | 399 |
| 13   | YFREKYTLQLKYPHLPCLQVGGQE QKHTYLPLEVCNIVAGQRCIKKLDNQTSTMIRATARSAPDRQEEISRLVRSANYET | 399 |
| 1    | YFREKYTLQLKYPHLPCLQVGGQE QKHTYLPLEVCNIVAGQRCIKKLDNQTSTMIRATARSAPDRQEEISRLVRSANYET | 391 |
| 105  | YFREKYTLQLKYPHLPCLQVGGQE QKHTYLPLEVCNIVAGQRCIKKLDNQTSTMIRATARSAPDRQEEISKLMSASFNT  | 391 |
| 107  | YFREKYTLQLKYPHLPCLQVGGQE QKHTYLPLEVCNIVAGQRCIKKLDNQTSTMIRATARSAPDRQEEISRLVRSANYET | 391 |
| 62   | YFREKYTLQLKYPHLPCLQVGGQE QKHTYLPLEVCNIVAGQRCIKKLDNQTSTMIRATARSAPDRQEEISRLVRSANYET | 391 |
| Ago3 | YFREKYTLQLKYPHLPCLQVGGQE QKHTYLPLEVCNIVAGQRCIKKLDNQTSTMIRATARSAPDRQEEISRLVRSANYET | 391 |

Supplementary Figure 7 Grimm



L2

|      |                                                                                     |     |
|------|-------------------------------------------------------------------------------------|-----|
| Ago2 | DPYVREFGIMVKDEMTDVTGRVLQPPSILYGGRNKAIATPVQGVWDMRNKQFHTGIEIKVWAIACFAPQRQCTEVHLKSF    | 470 |
| 59   | DPFVQEFQFKVRDEMAHVTGRVLPAPMLQYGGNRNRTVATPSHGVDWDMRGKQFHTGVEIKMWAIAACFATORQCREEILKGF | 462 |
| 44   | DPFVQEFQFKVRDEMAHVTGRVLPAPMLQYGGNRNRTVATPSHGVDWDMRGKQFHTGVEIKMWAIAACFATORQCREEILKGF | 470 |
| 2    | DPFVQEFQFKVRDEMAHVTGRVLPAPMLQYGGNRNRTVATPSHGVDWDMRGKQFHTGIEIKVWAIACFAPQRQCTEVHLKGF  | 462 |
| 88   | DPYVREFGIMVKDEMTDVTGRVLQPPSILYGGRNKAIATPVQGVWDMRNKQFHTGVEIKMWAIAACFATORQCREEILKGF   | 462 |
| 113  | DPFVQEFQFKVRDEMAHVTGRVLPAPMLQYGGNRNRTVATPSHGVDWDMRGKQFHTGVEIKMWAIAACFATORQCTEVHLKGF | 462 |
| 37   | DPFVQEFQFKVRDEMAHVTGRVLPAPMLQYGGNRNRTVATPSHGVDWDMRGKQFHTGVEIKMWAIAACFATORQCREEILKGF | 471 |
| 103  | DPFVQEFQFKVRDEMAHVTGRVLPAPMLQYGGNRNRTVATPSHGVDWDMRGKQFHTGVEIKMWAIAACFATORQCTEVHLKGF | 479 |
| 13   | DPFVQEFQFKVRDEMAHVTGRVLPAPMLQYGGNRNRTVATPVQGVWDMRNKQFHTGIEIKVWAIACFAPQRQCTEVHLKSF   | 479 |
| 1    | DPFVQEFQFKVRDEMAHVTGRVLPAPMLQYGGNRNRTVATPSHGVDWDMRGKQFHTGVEIKVWAIACFAPQRQCTEVHLKSF  | 471 |
| 105  | DPYVREFGIMVKDEMTDVTGRVLQPPSILYGGRNKAIATPVQGVWDMRNKQFHTGIEIKVWAIACFATORQCREEILKSF    | 471 |
| 107  | DPFVQEFQFKVRDEMAHVTGRVLPAPMLQYGGNRNRTVATPSHGVDWDMRGKQFHTGVEIKMWAIAACFATORQCREEILKGF | 471 |
| 62   | DPFVQEFQFKVRDEMAHVTGRVLPAPMLQYGGNRNRTVATPSHGVDWDMRGKQFHTGVEIKMWAIAACFATORQCREEILKGF | 471 |
| Ago3 | DPFVQEFQFKVRDEMAHVTGRVLPAPMLQYGGNRNRTVATPSHGVDWDMRGKQFHTGVEIKMWAIAACFATORQCREEILKGF | 471 |

MID

|      |                                                                                  |     |
|------|----------------------------------------------------------------------------------|-----|
| Ago2 | TEQLRKISRDAGMPIQQQPCFCKYAQGADSVEPMFRHLKNTYAGLQLVIVILPGKTPVYAEVKRVGDTVLGMAEQCVQMK | 550 |
| 59   | TDQLRKISKDAGMPIQQQPCFCKYAQGADSVEPMFRHLKNTYAGLQLIIVILPGKTPVYAEVKRVGDTLLGMAEQCVQMK | 542 |
| 44   | TDQLRKISKDAGMPIQQQPCFCKYAQGADSVEPMFRHLKNTYAGLQLIIVILPGKTPVYAEVKRVGDTVLGMAEQCVQMK | 550 |
| 2    | TDQLRKISRDAGMPIQQQPCFCKYAQGADSVEPMFRHLKNTYAGLQLVIVILPGKTPVYAEVKRVGDTLLGMAEQCVQMK | 542 |
| 88   | TDQLRKISKDAGMPIQQQPCFCKYAQGADSVEPMFRHLKNTYAGLQLIIVILPGKTPVYAEVKRVGDTLLGMAEQCVQMK | 542 |
| 113  | TDQLRKISRDAGMPIQQQPCFCKYAQGADSVEPMFRHLKNTYAGLQLIIVILPGKTPVYAEVKRVGDTLLGMAEQCVQMK | 542 |
| 37   | TDQLRKISRDAGMPIQQQPCFCKYAQGADSVEPMFRHLKNTYAGLQLIIVILPGKTPVYAEVKRVGDTLLGMAEQCVQMK | 551 |
| 103  | TDQLRKISKDAGMPIQQQPCFCKYAQGADSVEPMFRHLKNTYAGLQLIIVILPGKTPVYAEVKRVGDTLLGMAEQCVQMK | 559 |
| 13   | TDQLRKISKDAGMPIQQQPCFCKYAQGADSVEPMFRHLKNTYAGLQLIIVILPGKTPVYAEVKRVGDTLLGMAEQCVQMK | 559 |
| 1    | TEQLRKISKDAGMPIQQQPCFCKYAQGADSVEPMFRHLKNTYAGLQLVIVILPGKTPVYAEVKRVGDTVLGMAEQCVQMK | 551 |
| 105  | TDQLRKISKDAGMPIQQQPCFCKYAQGADSVEPMFRHLKNTYAGLQLIIVILPGKTPVYAEVKRVGDTLLGMAEQCVQMK | 551 |
| 107  | TDQLRKISKDAGMPIQQQPCFCKYAQGADSVEPMFRHLKNTYAGLQLVIVILPGKTPVYAEVKRVGDTVLGMAEQCVQMK | 551 |
| 62   | TDQLRKISKDAGMPIQQQPCFCKYAQGADSVEPMFRHLKNTYAGLQLVIVILPGKTPVYAEVKRVGDTLLGMAEQCVQMK | 551 |
| Ago3 | TDQLRKISKDAGMPIQQQPCFCKYAQGADSVEPMFRHLKNTYAGLQLIIVILPGKTPVYAEVKRVGDTLLGMAEQCVQMK | 551 |

|      |                                                                                |     |
|------|--------------------------------------------------------------------------------|-----|
| Ago2 | NVQRTTPQTLNCLKINVKLGGVNNILVPHQRPSVFQPPVIFLGADVTHPPAGDGKKPSIAAVVGSMDAHPNRYCATVR | 630 |
| 59   | NVQRTTPQTLNCLKINVKLGGVNNILVPHQRPSVFQPPVIFLGADVTHPPAGDGKKPSIAAVVGSMDAHPNRYCATVR | 622 |
| 44   | NVQRTTPQTLNCLKINVKLGGVNNILVPHQRPSVFQPPVIFLGADVTHPPAGDGKKPSIAAVVGSMDAHPNRYCATVR | 630 |
| 2    | NVIKTSPTLSNCLKINVKLGGVNNILVPHQRPSVFQPPVIFLGADVTHPPAGDGKKPSIAAVVGSMDAHPNRYCATVR | 622 |
| 88   | NVIKTSPTLSNCLKINVKLGGVNNILVPHQRPSVFQPPVIFLGADVTHPPAGDGKKPSIAAVVGSMDAHPNRYCATVR | 622 |
| 113  | NVIKTSPTLSNCLKINVKLGGVNNILVPHQRPSVFQPPVIFLGADVTHPPAGDGKKPSIAAVVGSMDAHPNRYCATVR | 622 |
| 37   | NVIKTSPTLSNCLKINVKLGGVNNILVPHQRPSVFQPPVIFLGADVTHPPAGDGKKPSIAAVVGSMDAHPNRYCATVR | 631 |
| 103  | NVIKTSPTLSNCLKINVKLGGVNNILVPHQRPSVFQPPVIFLGADVTHPPAGDGKKPSIAAVVGSMDAHPNRYCATVR | 639 |
| 13   | NVIKTSPTLSNCLKINVKLGGVNNILVPHQRPSVFQPPVIFLGADVTHPPAGDGKKPSIAAVVGSMDAHPNRYCATVR | 639 |
| 1    | NVIKTSPTLSNCLKINVKLGGVNNILVPHQRPSVFQPPVIFLGADVTHPPAGDGKKPSIAAVVGSMDAHPNRYCATVR | 631 |
| 105  | NVIKTSPTLSNCLKINVKLGGVNNILVPHQRPSVFQPPVIFLGADVTHPPAGDGKKPSIAAVVGSMDAHPNRYCATVR | 631 |
| 107  | NVIKTSPTLSNCLKINVKLGGVNNILVPHQRPSVFQPPVIFLGADVTHPPAGDGKKPSIAAVVGSMDAHPNRYCATVR | 631 |
| 62   | NVIKTSPTLSNCLKINVKLGGVNNILVPHQRPSVFQPPVIFLGADVTHPPAGDGKKPSIAAVVGSMDAHPNRYCATVR | 631 |
| Ago3 | NVIKTSPTLSNCLKINVKLGGVNNILVPHQRPSVFQPPVIFLGADVTHPPAGDGKKPSIAAVVGSMDAHPNRYCATVR | 631 |

PIWI

|      |                                                                                   |     |
|------|-----------------------------------------------------------------------------------|-----|
| Ago2 | VQQRQREI IQDLAAMVRELLIQFYKSTRFKPTRIIFYRQGVSEGFQVQLHHELLAIREACIKLEKDYQPGITFIVVQKR  | 710 |
| 59   | VQRPRQREI IQDLASMVRELLIQFYKSTRFKPTRIIFYRQGVSEGFQVQLYELLAIREACIKLEKDYQPGITFIVVQKR  | 702 |
| 44   | VQQRQREI IQDLASMVRELLIQFYKSTRFKPTRIIFYRQGVSEGFQVQLYELLAIREACISLEKDYQPGITYIVVQKR   | 710 |
| 2    | VQRPRQREI IQDLASMVRELLIQFYKSTRFKPTRIIFYRQGVSEGFQVQLHHELLAIREACIKLEKDYQPGITFIVVQKR | 702 |
| 88   | VQRPRQREI IQDLAAMVRELLIQFYKSTRFKPTRIIFYRQGVSEGFQVQLYELLAIREACISLEKDYQPGITYIVVQKR  | 702 |
| 113  | VQQRQREI IQDLAAMVRELLIQFYKSTRFKPTRIIFYRQGVSEGFQVQLYELLAIREACISLEKDYQPGITFIVVQKR   | 702 |
| 37   | VQQRQREI IQDLASMVRELLIQFYKSTRFKPTRIIFYRQGVSEGFQVQLYELLAIREACISLEKDYQPGITYIVVQKR   | 711 |
| 103  | VQRPRQREI IQDLASMVRELLIQFYKSTRFKPTRIIFYRQGVSEGFQVQLYELLAIREACISLEKDYQPGITYIVVQKR  | 719 |
| 13   | VQRPRQREI IQDLASMVRELLIQFYKSTRFKPTRIIFYRQGVSEGFQVQLYELLAIREACISLEKDYQPGITYIVVQKR  | 719 |
| 1    | VQRPRQREI IQDLASMVRELLIQFYKSTRFKPTRIIFYRQGVSEGFQVQLYELLAIREACISLEKDYQPGITYIVVQKR  | 711 |
| 105  | VQRPRQREI IQDLASMVRELLIQFYKSTRFKPTRIIFYRQGVSEGFQVQLYELLAIREACISLEKDYQPGITFIVVQKR  | 711 |
| 107  | VQRPRQREI IQDLAAMVRELLIQFYKSTRFKPTRIIFYRQGVSEGFQVQLHHELLAIREACIKLEKDYQPGITYIVVQKR | 711 |
| 62   | VQRPRQREI IQDLASMVRELLIQFYKSTRFKPTRIIFYRQGVSEGFQVQLYELLAIREACISLEKDYQPGITYIVVQKR  | 711 |
| Ago3 | VQRPRQREI IQDLASMVRELLIQFYKSTRFKPTRIIFYRQGVSEGFQVQLYELLAIREACISLEKDYQPGITYIVVQKR  | 711 |

|      |                                                                                   |     |
|------|-----------------------------------------------------------------------------------|-----|
| Ago2 | HHTRLFCADTKNERVGRSGNIPAGTTVDTKITHPTEFDFYLCSHAGIQGTSRPSHYHVLWDDNRFSSDELQILTYQLCHTY | 790 |
| 59   | HHTRLFCADRTERVGRSGNIPAGTTVDTDITHPYEFDFYLCSHAGIQGTSRPSHYHVLWDDNRFSSDELQILTYQLCHTY  | 782 |
| 44   | HHTRLFCADRTERVGRSGNIPAGTTVDTKITHPTEFDFYLCSHAGIQGTSRPSHYHVLWDDNRFSSDELQILTYQLCHTY  | 790 |
| 2    | HHTRLFCADTKNERVGRSGNIPAGTTVDTKITHPTEFDFYLCSHAGIQGTSRPSHYHVLWDDNCFTELQILTYQLCHTY   | 782 |
| 88   | HHTRLFCADRTERVGRSGNIPAGTTVDTDITHPYEFDFYLCSHAGIQGTSRPSHYHVLWDDNCFTELQILTYQLCHTY    | 782 |
| 113  | HHTRLFCADTKNERVGRSGNIPAGTTVDTKITHPTEFDFYLCSHAGIQGTSRPSHYHVLWDDNRFSSDELQILTYQLCHTY | 782 |
| 37   | HHTRLFCADTKNERVGRSGNIPAGTTVDTDITHPYEFDFYLCSHAGIQGTSRPSHYHVLWDDNCFTELQILTYQLCHTY   | 791 |
| 103  | HHTRLFCADRTERVGRSGNIPAGTTVDTKITHPTEFDFYLCSHAGIQGTSRPSHYHVLWDDNRFSSDELQILTYQLCHTY  | 799 |
| 13   | HHTRLFCADRTERVGRSGNIPAGTTVDTDITHPYEFDFYLCSHAGIQGTSRPSHYHVLWDDNRFSSDELQILTYQLCHTY  | 799 |
| 105  | HHTRLFCADTKNERVGRSGNIPAGTTVDTDITHPYEFDFYLCSHAGIQGTSRPSHYHVLWDDNRFSSDELQILTYQLCHTY | 791 |
| 107  | HHTRLFCADRTERVGRSGNIPAGTTVDTDITHPYEFDFYLCSHAGIQGTSRPSHYHVLWDDNRFSSDELQILTYQLCHTY  | 791 |
| 62   | HHTRLFCADRTERVGRSGNIPAGTTVDTDITHPYEFDFYLCSHAGIQGTSRPSHYHVLWDDNCFTELQILTYQLCHTY    | 791 |
| Ago3 | HHTRLFCADRTERVGRSGNIPAGTTVDTDITHPYEFDFYLCSHAGIQGTSRPSHYHVLWDDNCFTELQILTYQLCHTY    | 791 |

Supplementary Figure 7 Grimm - continued

|      | PIWI                                                                 |     |
|------|----------------------------------------------------------------------|-----|
| Ago2 | VRCTRSVSIAPAYYAHLVAFRARYHLVDKEHDSAEGSHTSGQSNGRDHQALAKAVQVHQDTLRTMYFA | 859 |
| 59   | VRCTRSVSIAPAYYAHLVAFRARYHLVDKEHDSAEGSHVSGQSNGRDPQALAKAVQIHQDTLRTMYFA | 851 |
| 44   | VRCTRSVSIAPAYYAHLVAFRARYHLVDKEHDSAEGSHTSGQSNGRDHQALAKAVQVHQDTLRTMYFA | 859 |
| 2    | VRCTRSVSIAPAYYAHLVAFRARYHLVDKEHDSAEGSHVSGQSNGRDPQALAKAVQIHQDTLRTMYFA | 851 |
| 88   | VRCTRSVSIAPAYYAHLVAFRARYHLVDKEHDSAEGSHTSGQSNGRDHQALAKAVQVHQDTLRTMYFA | 851 |
| 113  | VRCTRSVSIAPAYYAHLVAFRARYHLVDKEHDSAEGSHVSGQSNGRDPQALAKAVQIHQDTLRTMYFA | 851 |
| 37   | VRCTRSVSIAPAYYAHLVAFRARYHLVDKEHDSAEGSHTSGQSNGRDHQALAKAVQVHQDTLRTMYFA | 860 |
| 103  | VRCTRSVSIAPAYYAHLVAFRARYHLVDKEHDSAEGSHVSGQSNGRDPQALAKAVQIHQDTLRTMYFA | 868 |
| 13   | VRCTRSVSIAPAYYAHLVAFRARYHLVDKEHDSAEGSHTSGQSNGRDHQALAKAVQVHQDTLRTMYFA | 868 |
| 1    | VRCTRSVSIAPAYYAHLVAFRARYHLVDKEHDSAEGSHTSGQSNGRDHQALAKAVQVHQDTLRTMYFA | 860 |
| 105  | VRCTRSVSIAPAYYAHLVAFRARYHLVDKEHDSAEGSHTSGQSNGRDHQALAKAVQVHQDTLRTMYFA | 860 |
| 107  | VRCTRSVSIAPAYYAHLVAFRARYHLVDKEHDSAEGSHVSGQSNGRDPQALAKAVQIHQDTLRTMYFA | 860 |
| 62   | VRCTRSVSIAPAYYAHLVAFRARYHLVDKEHDSAEGSHVSGQSNGRDPQALAKAVQIHQDTLRTMYFA | 860 |
| Ago3 | VRCTRSVSIAPAYYAHLVAFRARYHLVDKEHDSAEGSHVSGQSNGRDPQALAKAVQIHQDTLRTMYFA | 860 |

\*

b

|      |                                                                                    |    |
|------|------------------------------------------------------------------------------------|----|
| Ago2 | MYSG-AGPALAPPAPPPPIQGYAFKPPRPDFGTSGRITKQLQANFFEMDIPKIDIVHYELDIKPEKCPRRVNREIVEHVM   | 79 |
| 59   | MEIGSAGPAGAQP-----LLMVRRPGYGTSGRTIKLQANFFEMDIPKIDIVHYELDIKPEKCPRRVNREIVEHVM        | 71 |
| 110  | MEIGSAGPAGAQP-----LLMVRRPGYGTSGRTIKLQANFFEMDIPKIDIVHYEVDIKPEKCPRRVNREIVEHVM        | 71 |
| 44   | MYSG-AGPALAPPAPPPPIQGYAFKPPRPDFGTSGRITKQLQANFFEMDIPKIDIVHYELDIKPKDKCPRRVNREIVVDSMV | 79 |
| 78   | MEIGSAGPAGAQP-----LLMVRRPGYGTSGRTIKLQANFFEMDIPKIDIVHYELDIKPEKCPRRVNREIVEHVM        | 71 |
| 129  | MYSG-AGPALAPPAPPPPIQGYAFKPPRPDFGTSGRITKQLQANFFEMDIPKIDVLYEVDIKPKDKCPRRVNREIVVDSMV  | 79 |
| 74   | MYSG-AGPALAPPAPPPPIQGYAFKPPRPDFGTSGRITKQLQANFFEMDIPKIDIVHYELDIKPEKCPRRVNREIVVDSMV  | 79 |
| 2    | MEIGSAGPAGAQP-----LLMVRRPGYGTSGRTIKLQANFFEMDIPKIDVLYEVDIKPKDKCPRRVNREIVVDSMV       | 71 |
| 82   | MYSG-AGPALAPPAPPPPIQGYAFKPPRPDFGTSGRITKQLQANFFEMDIPKIDIVHYELDIKPEKCPRRVNREIVEHVM   | 79 |
| Ago3 | MEIGSAGPAGAQP-----LLMVRRPGYGTSGRTIKLQANFFEMDIPKIDVLYEVDIKPKDKCPRRVNREIVVDSMV       | 71 |

Motif I

|          |                                                                                   |     |
|----------|-----------------------------------------------------------------------------------|-----|
| <b>N</b> |                                                                                   |     |
| Ago2     | QHFKTQIFGDRKPVFDGRKNLYTAMPLPIGRDKVELEVTLPPEG-KDRIFKVSIKWVSCVSLQALHDALSGRLPSVPFET  | 158 |
| 59       | QHFKVTIFGDRRPPVYDGKRSLYTANPLPVATTGVLDLVTLPPEGGKDRPFKVSIKWVSCVSLQALHDALSGRLPSVPFET | 150 |
| 110      | QHFKTQIFGDRRPPVYDGKRSLYTANPLPVATTGVLDLVTLPPEGGKDRPFKVSIKWVSCVSLQALHDALSGRLPSVPFET | 151 |
| 44       | QHFKTQIFGDRKPVFDGRKNLYTAMPLPIGRDKVELEVTLPPEG-KDRIFKVSIKWVSCVSLQALHDALSGRLPSVPFET  | 158 |
| 78       | QHFKTQIFGDRKPVFDGRKNLYTAMPLPIGRDKVELEVTLPPEG-KDRIFKVSIKWVSCVSLQALHDALSGRLPSVPFET  | 150 |
| 129      | QHFKVTIFGDRRPPVYDGKRSLYTANPLPVATTGVLDLVTLPPEGGKDRPFKVSIKWVSCVSLQALHDALSGRLPSVPFET | 159 |
| 74       | QHFKVTIFGDRRPPVYDGKRSLYTANPLPVATTGVLDLVTLPPEGGKDRPFKVSIKWVSCVSLQALHDALSGRLPSVPFET | 159 |
| 2        | QHFKVTIFGDRRPPVYDGKRSLYTAMPLPIGRDKVELEVTLPPEG-KDRIFKVSIKWVSCVSLQALHDALSGRLPSVPFET | 150 |
| 82       | QHFKTQIFGDRKPVFDGRKNLYTAMPLPIGRDKVELEVTLPPEG-KDRIFKVSIKWVSCVSLQALHDALSGRLPSVPFET  | 158 |
| Ago3     | QHFKVTIFGDRRPPVYDGKRSLYTANPLPVATTGVLDLVTLPPEGGKDRPFKVSIKWVSCVSLQALHDALSGRLPSVPFET | 151 |

Motif II

|           |                                                                                  |     |
|-----------|----------------------------------------------------------------------------------|-----|
| <b>L1</b> |                                                                                  |     |
| Ago2      | -----IQALDVVMRHLPSMRYTPVGRSFFTASEGCSNPLGGGREVWFGFHQSVRPSLWKMMLNIDVSATAFYKAQPV    | 230 |
| 59        | -----IQALDVVMRHLPSMRYTPVGRSFFTASEGCSNPLGGGREVWFGFHQSVRPSLWKMMLNIDVSATAFYKAQPV    | 222 |
| 110       | -----IQALDVVMRHLPSMRYTPVGRSFFTASEGCSNPLGGGREVWFGFHQSVRPSLWKMMLNIDVSATAFYKAQPV    | 223 |
| 44        | -----IQALDVVMRHLPSMRYTPVGRSFFTASEGCSNPLGGGREVWFGFHQSVRPSLWKMMLNIDVSATAFYKAQPV    | 230 |
| 78        | -----IQALDVVMRHLPSMRYTPVGRSFFTASEGCSNPLGGGREVWFGFHQSVRPSLWKMMLNIDVSATAFYKAQPV    | 222 |
| 129       | -----IQALDVVMRHLPSMRYTPVGRSFFTASEGCSNPLGGGREVWFGFHQSVRPSLWKMMLNIDVSATAFYKAQPV    | 231 |
| 74        | -----IQALDVVMRHLPSMRYTPVGRSFFTASEGCSNPLGGGREVWFGFHQSVRPSLWKMMLNIDVSATAFYKAQPV    | 231 |
| 2         | -----IQALDVVLRHLPSMRYTPVGRSFFTASEGCSNPLGGGREVWFGFHQSVRPSLWKMMLNIDVSATAFYKAQPV    | 222 |
| 82        | -----IQALDVVMRHLPSMRYTPVGRSFFTASEGCSNPLGGGREVWFGFHQSVRPSLWKMMLNIDVSATAFYKAQPV    | 230 |
| Ago3      | DKP1STNPVHAVDVVLRHLPSMRYTPVGRSFFTASEGCSNPLGGGREVWFGFHQSVRPSLWKMMLNIDVSATAFYKAQPV | 231 |

PAZ

|      |                                                                                   |     |
|------|-----------------------------------------------------------------------------------|-----|
| Ago2 | IEFVCEVLDFKSIEEQKPLTDSQRVKFTKEIKGLKVEITHCGQMKRKYRVCNVRTRRPASHQTFPLQESGQTVECTVAQ   | 310 |
| 59   | IQFMCEVLDIHNIDEQPRPLTDSHRVKFTKEIKGLKVEITHCGTMRKRYRVCNVRTRRPASHQTFPLQLENGQTVERTVAQ | 302 |
| 110  | IEFVCEVLDFKSIEEQKPLTDSQRVKFTKEIKGLKVEITHCGTMRKRYRVCNVRTRRPASHQTFPLQLENGQTVERTVAQ  | 303 |
| 44   | IQFMCEVLDIHNIDEQPRPLTDSHRVKFTKEIKGLKVEITHCGTMRKRYRVCNVRTRRPASHQTFPLQLENGQTVERTVAQ | 310 |
| 78   | IQFMCEVLDIHNIDEQPRPLTDSHRVKFTKEIKGLKVEITHCGTMRKRYRVCNVRTRRPASHQTFPLQLENGQTVERTVAQ | 302 |
| 129  | IQFMCEVLDIHNIDEQPRPLTDSHRVKFTKEIKGLKVEITHCGTMRKRYRVCNVRTRRPASHQTFPLQESGQTVECTVAQ  | 311 |
| 74   | IQFVCEVLDFKSIEEQKPLTDSHRVKFTKEIKGLKVEITHCGTMRKRYRVCNVRTRRPASHQTFPLQLENGQTVERTVAQ  | 311 |
| 2    | IQFMCEVLDIHNIDEQPRPLTDSHRVKFTKEIKGLKVEITHCGTMRKRYRVCNVRTRRPASHQTFPLQLENGQTVECTVAQ | 302 |
| 82   | IQFMCEVLDIHNIDEQPRPLTDSHRVKFTKEIKGLKVEITHCGQMKRKYRVCNVRTRRPASHQTFPLQESGQTVECTVAQ  | 310 |
| Ago3 | IQFMCEVLDIHNIDEQPRPLTDSHRVKFTKEIKGLKVEITHCGTMRKRYRVCNVRTRRPASHQTFPLQLENGQTVERTVAQ | 311 |

|      |                                                                                  |     |
|------|----------------------------------------------------------------------------------|-----|
| Ago2 | YFKDRHKLIVLRYPHLPCLQVQEQKHTYLPLEVCNIVAGQRCIKKLTNDQSTSMIRATARSAPDRQEEISKLMRSASFNT | 390 |
| 59   | YFREKYTLQLKYPHLPCLQVQEQKHTYLPLEVCNIVAGQRCIKKLTNDQSTSMIRATARSAPDRQEEISRLVRSANYET  | 382 |
| 110  | YFKDRHKLIVLRYPHLPCLQVQEQKHTYLPLEVCNIVAGQRCIKKLTNDQSTSMIKATARSAPDRQEEISRLVRSANYET | 383 |
| 44   | YFREKYTLQLKYPHLPCLQVQEQKHTYLPLEVCNIVAGQRCIKKLTNDQSTSMIRATARSAPDRQEEISRLVRSANYET  | 390 |
| 78   | YFREKYTLQLKYPHLPCLQVQEQKHTYLPLEVCNIVAGQRCIKKLTNDQSTSMIRATARSAPDRQEEISRLVRSANYET  | 382 |
| 129  | YFKDRHKLIVLRYPHLPCLQVQEQKHTYLPLEVCNIVAGQRCIKKLTNDQSTSMIKATARSAPDRQEEISRLVRSANYET | 391 |
| 74   | YFREKYTLQLKYPHLPCLQVQEQKHTYLPLEVCNIVAGQRCIKKLTNDQSTSMIKATARSAPDRQEEISRLVRSANYET  | 391 |
| 2    | YFREKYTLQLKYPHLPCLQVQEQKHTYLPLEVCNIVAGQRCIKKLTNDQSTSMIRATARSAPDRQEEISRLVRSANYET  | 382 |
| 82   | YFKDRHKLIVLRYPHLPCLQVQEQKHTYLPLEVCNIVAGQRCIKKLTNDQSTSMIKATARSAPDRQEEISRLVRSANYET | 390 |
| Ago3 | YFREKYTLQLKYPHLPCLQVQEQKHTYLPLEVCNIVAGQRCIKKLTNDQSTSMIKATARSAPDRQEEISRLVRSANYET  | 391 |

L2

MID

|      |                                                                                    |     |
|------|------------------------------------------------------------------------------------|-----|
| Ago2 | DPFVREFGIMVKDEM TDVTGRVLPQPSILYGGRNKAIATPVQGVWDMRNRKQFHTGIEIKVWAIACFAPQRQCTEVHLKSF | 470 |
| 59   | DPFVQEFQFKVRDEMAHVTGRVLPAPMLQYGGNRNRTVATPSHGVDWDMRGKQFHTGVEIKMWAIACFATQRQCREEILKGF | 462 |
| 110  | DPFVQEFQFKVRDEMAHVTGRVLPAPMLQYGGNRNRTVATPSHGVDWDMRGKQFHTGVEIKMWAIACFATQRQCREEILKGF | 463 |
| 44   | DPFVQEFQFKVRDEMAHVTGRVLPAPMLQYGGNRNRTVATPSHGVDWDMRGKQFHTGVEIKMWAIACFATQRQCREEILKGF | 470 |
| 78   | DPFVQEFQFKVRDEMAHVTGRVLPAPMLQYGGNRNRTVATPSHGVDWDMRGKQFHTGVEIKVWAIACFAPQRQCTEVHLKSF | 462 |
| 129  | DPFVQEFQFKVRDEMAHVTGRVLPAPMLQYGGNRNRTVATPSHGVDWDMRGKQFHTGVEIKMWAIACFATQRQCREEILKGF | 471 |
| 74   | DPFVQEFQFKVRDEMAHVTGRVLPAPMLQYGGNRNRTVATPSHGVDWDMRGKQFHTGVEIKMWAIACFATQRQCTEVHLKSF | 471 |
| 2    | DPFVQEFQFKVRDEMAHVTGRVLPAPMLQYGGNRNRTVATPSHGVDWDMRGKQFHTGIEIKVWAIACFAPQRQCTEVHLKGF | 462 |
| 82   | DPFVQEFQFKVRDEMAHVTGRVLPQPSILYGGRNKAIATPVQGVWDMRNRKQFHTGIEIKVWAIACFAPQRQCTEVHLKSF  | 470 |
| Ago3 | DPFVQEFQFKVRDEMAHVTGRVLPAPMLQYGGNRNRTVATPSHGVDWDMRGKQFHTGVEIKMWAIACFATQRQCREEILKGF | 471 |

| MID  |                                                                                       |     |
|------|---------------------------------------------------------------------------------------|-----|
| Ago2 | TEQLRKISR DAGMPIQGQPCFCKYAQGADSV EPMFRHLKNTYAGLQLV VVILPGKTPVYAEVKRVGDTVLGMA TQCVQMK  | 550 |
| 59   | TDQLRKISK DAGMPIQGQPCFCKYAQGADSV EPMFRHLKNTYAGLQLI IIVILPGKTPVYAEVKRVGDTLLGMA TQCVQMK | 542 |
| 110  | TDQLRKISK DAGMPIQGQPCFCKYAQGADSV EPMFRHLKNTYAGLQLI IIVILPGKTPVYAEVKRVGDTVLGMA TQCVQVK | 543 |
| 44   | TDQLRKISK DAGMPIQGQPCFCKYAQGADSV EPMFRHLKNTYAGLQLI IIVILPGKTPVYAEVKRVGDTVLGMA TQCVQMK | 550 |
| 78   | TEQLRKISR DAGMPIQGQPCFCKYAQGADSV EPMFRHLKNTYAGLQLV VVILPGKTPVYAEVKRVGDTLLGMA TQCVQVK  | 542 |
| 129  | TDQLRKISK DAGMPIQGQPCFCKYAQGADSV EPMFRHLKNTYAGLQLV VVILPGKTPVYAEVKRVGDTLLGMA TQCVQVK  | 551 |
| 74   | TEQLRKISK DAGMPIQGQPCFCKYAQGADSV EPMFRHLKNTYAGLQLV VVILPGKTPVYAEVKRVGDTLLGMA TQCVQMK  | 551 |
| 2    | TDQLRKISR DAGMPIQGQPCFCKYAQGADSV EPMFRHLKNTYAGLQLV VVILPGKTPVYAEVKRVGDTLLGMA TQCVQVK  | 542 |
| 82   | TEQLRKISK DAGMPIQGQPCFCKYAQGADSV EPMFRHLKNTYAGLQLI IIVILPGKTPVYAEVKRVGDTLLGMA TQCVQVK | 550 |
| Ago3 | TDQLRKISK DAGMPIQGQPCFCKYAQGADSV EPMFRHLKNTYAGLQLI IIVILPGKTPVYAEVKRVGDTLLGMA TQCVQVK | 551 |

|      |                                                                                      |     |
|------|--------------------------------------------------------------------------------------|-----|
| Ago2 | NVQRTTPQ TLSNLCLKINVKLGGVNNILLPQGR PVPVFPQVIFL GADVTHPPAGDGKKPSIAAVVGSMDAHPNRYCATVR  | 630 |
| 59   | NVQRTTPQ TLSNLCLKINVKLGGINNILVPHQR PVSFQQPVIFL GADVTHPPAGDGKKPSIAAVVGSMDAHP SRYCATVR | 622 |
| 110  | NVIKTS PQLSNLCLKINVKLGGINNILVPHQR PVSFQQPVIFL GADVTHPPAGDGKKPSIAAVVGSMDAHPNRYCATVR   | 623 |
| 44   | NVQRTTPQ TLSNLCLKINVKLGGVNNILLPQGR PVPVFPQVIFL GADVTHPPAGDGKKPSIAAVVGSMDAHPNRYCATVR  | 630 |
| 78   | NVIKTS PQLSNLCLKINVKLGGINNILVPHQR PVSFQQPVIFL GADVTHPPAGDGKKPSIAAVVGSMDAHP SRYCATVR  | 622 |
| 129  | NVIKTS PQLSNLCLKINVKLGGINNILVPHQR PVSFQQPVIFL GADVTHPPAGDGKKPSIAAVVGSMDAHP SRYCATVR  | 631 |
| 74   | NVQRTTPQ TLSNLCLKINVKLGGVNNILLPQGR PVPVFPQVIFL GADVTHPPAGDGKKPSIAAVVGSMDAHP SRYCATVR | 631 |
| 2    | NVIKTS PQLSNLCLKINVKLGGINNILVPHQR PVSFQQPVIFL GADVTHPPAGDGKKPSIAAVVGSMDAHPNRYCATVR   | 622 |
| 82   | NVIKTS PQLSNLCLKINVKLGGINNILVPHQR PVSFQQPVIFL GADVTHPPAGDGKKPSIAAVVGSMDAHPNRYCATVR   | 630 |
| Ago3 | NVIKTS PQLSNLCLKINVKLGGINNILVPHQR PVSFQQPVIFL GADVTHPPAGDGKKPSIAAVVGSMDAHP SRYCATVR  | 631 |

\*

| PIWI |                                                                                       |     |
|------|---------------------------------------------------------------------------------------|-----|
| Ago2 | VQQHROE I IQDLAAMVRELLIQFYKSTRFKP TRIIFYR DGVSEGGFQQV LHHELLAIREACIKLEKDYQPGITFIVVQKR | 710 |
| 59   | VQRPROE I IQDLASMVRELLIQFYKSTRFKP TRIIFYR DGVSEGGFRQV LLYELLAIREACIKLEKDYQPGITFIVVQKR | 702 |
| 110  | VQRPROE I IQDLASMVRELLIQFYKSTRFKP TRIIFYR DGVSEGGFQQV LHHELLAIREACISLEKDYQPGITFIVVQKR | 703 |
| 44   | VQQHROE I IQDLAAMVRELLIQFYKSTRFKP TRIIFYR DGVSEGGFRQV LLYELLAIREACISLEKDYQPGITFIVVQKR | 710 |
| 78   | VQQHROE I IQDLAAMVRELLIQFYKSTRFKP TRIIFYR DGVSEGGFRQV LLYELLAIREACISLEKDYQPGITFIVVQKR | 702 |
| 129  | VQRPROE I IQDLAAMVRELLIQFYKSTRFKP TRIIFYR DGVSEGGFQQV LHHELLAIREACISLEKDYQPGITFIVVQKR | 711 |
| 74   | VQRPROE I IQDLAAMVRELLIQFYKSTRFKP TRIIFYR DGVSEGGFQQV LHHELLAIREACIKLEKDYQPGITFIVVQKR | 711 |
| 2    | VQRPROE I IQDLASMVRELLIQFYKSTRFKP TRIIFYR DGVSEGGFRQV LLYELLAIREACIKLEKDYQPGITFIVVQKR | 702 |
| 82   | VQQHROE I IQDLASMVRELLIQFYKSTRFKP TRIIFYR DGVSEGGFRQV LLYELLAIREACISLEKDYQPGITFIVVQKR | 710 |
| Ago3 | VQRPROE I IQDLASMVRELLIQFYKSTRFKP TRIIFYR DGVSEGGFRQV LLYELLAIREACISLEKDYQPGITFIVVQKR | 711 |

\*

\*

|      |                                                                                     |     |
|------|-------------------------------------------------------------------------------------|-----|
| Ago2 | HHTRLFCAD RTERVGRSGNIPAGTTVDTKI THPEYFD FYLCSHAGIQGTSRPSHYHVLWDDNCFSSDELQILTYQLCHTY | 790 |
| 59   | HHTRLFCAD RTERVGRSGNIPAGTTVDTDI THPEYFD FYLCSHAGIQGTSRPSHYHVLWDDNCFSSDELQILTYQLCHTY | 782 |
| 110  | HHTRLFCAD RTERVGRSGNIPAGTTVDTDI THPEYFD FYLCSHAGIQGTSRPSHYHVLWDDNCFSSDELQILTYQLCHTY | 783 |
| 44   | HHTRLFCAD RTERVGRSGNIPAGTTVDTKI THPEYFD FYLCSHAGIQGTSRPSHYHVLWDDNCFSSDELQILTYQLCHTY | 790 |
| 78   | HHTRLFCAD RTERVGRSGNIPAGTTVDTDI THPEYFD FYLCSHAGIQGTSRPSHYHVLWDDNCFSSDELQILTYQLCHTY | 782 |
| 129  | HHTRLFCAD RTERVGRSGNIPAGTTVDTKI THPEYFD FYLCSHAGIQGTSRPSHYHVLWDDNCFSSDELQILTYQLCHTY | 791 |
| 74   | HHTRLFCAD RTERVGRSGNIPAGTTVDTDI THPEYFD FYLCSHAGIQGTSRPSHYHVLWDDNCFSSDELQILTYQLCHTY | 791 |
| 2    | HHTRLFCAD RTERVGRSGNIPAGTTVDTKI THPEYFD FYLCSHAGIQGTSRPSHYHVLWDDNCFSSDELQILTYQLCHTY | 782 |
| 82   | HHTRLFCAD RTERVGRSGNIPAGTTVDTDI THPEYFD FYLCSHAGIQGTSRPSHYHVLWDDNCFSSDELQILTYQLCHTY | 790 |
| Ago3 | HHTRLFCAD RTERVGRSGNIPAGTTVDTDI THPEYFD FYLCSHAGIQGTSRPSHYHVLWDDNCFSSDELQILTYQLCHTY | 791 |

|      |                                                                           |     |
|------|---------------------------------------------------------------------------|-----|
| Ago2 | VRCTRSVSI PAPAYYAHLVAFRARYHLVDKEHDS AEGSHTSGQSNGRDHQALAKAVQVHQD TLRMTMYFA | 859 |
| 59   | VRCTRSVSI PAPAYYAHLVAFRARYHLVDKEHDS AEGSHVSGQSNGRDPQALAKAVQIHQD TLRMTMYFA | 851 |
| 110  | VRCTRSVSI PAPAYYAHLVAFRARYHLVDKEHDS AEGSHTSGQSNGRDHQALAKAVQVHQD TLRMTMYFA | 852 |
| 44   | VRCTRSVSI PAPAYYAHLVAFRARYHLVDKEHDS AEGSHTSGQSNGRDHQALAKAVQVHQD TLRMTMYFA | 859 |
| 78   | VRCTRSVSI PAPAYYAHLVAFRARYHLVDKEHDS AEGSHTSGQSNGRDPQALAKAVQIHQD TLRMTMYFA | 851 |
| 129  | VRCTRSVSI PAPAYYAHLVAFRARYHLVDKEHDS AEGSHTSGQSNGRDPQALAKAVQIHQD TLRMTMYFA | 860 |
| 74   | VRCTRSVSI PAPAYYAHLVAFRARYHLVDKEHDS AEGSHTSGQSNGRDHQALAKAVQIHQD TLRMTMYFA | 860 |
| 2    | VRCTRSVSI PAPAYYAHLVAFRARYHLVDKEHDS AEGSHVSGQSNGRDPQALAKAVQIHQD TLRMTMYFA | 851 |
| 82   | VRCTRSVSI PAPAYYAHLVAFRARYHLVDKEHDS AEGSHTSGQSNGRDPQALAKAVQIHQD TLRMTMYFA | 859 |
| Ago3 | VRCTRSVSI PAPAYYAHLVAFRARYHLVDKEHDS AEGSHVSGQSNGRDPQALAKAVQIHQD TLRMTMYFA | 860 |

\*

C

|      |                                                                                    |    |
|------|------------------------------------------------------------------------------------|----|
| Ago1 | MEAGPSGAAAGAYLPP---LQQVFQAPRRPGIGTVGKPIKLLANYFEVDIPKIDVYHYEVDIKPDKCPRRVNREVVEYMV   | 77 |
| Ago2 | -MYSGAGPALAPPAPPPP IQGYAFKPPPRDFGTSGRITIKLQANFFEMDIPKID IYHYELDIKPEKCPRRVNREIVEHVM | 79 |
| Ago3 | MEIGSAGPAG-----AQLLMVPRRP GYGTMGKPIKLLANCFQVEIPKIDVYLYEVDIKPDKCPRRVNREVVDSTMV      | 71 |
| Ago4 | --MEALGPGP-----PASLFQPPRRPGLGTGKPIRLLANHFQVQIPKIDVYHYDVIDIKPEKRRRVNREVVDTMV        | 69 |
| #1   | --MEALGPGP-----PASLFQPPRRPGLGTGKPIRLLANHFQVQIPKIDVYHYDVIDIKPEKRRRVNREVVDTMV        | 69 |
| #3   | -MYSGAGPALAPPAPPPP IQGYAFKPPPRDFGTSGRITIKLQANFFEMDIPKID IYHYELDIKPEKCPRRVNREIVEHVM | 79 |
| #5   | MEAGPSGAAAGAYLPP---LQQVFQAPRRPGIGTVGKPIKLLANYFEVDIPKIDVYHYEVDIKPDKCPRRVNREVVEYMV   | 77 |
| #7   | MEIGSAGPAG-----AQLLMVPRRP GYGTMGKPIKLLANCFQVEIPKIDVYLYEVDIKPDKCPRRVNREVVDSTMV      | 71 |
| #14  | MEIGSAGPAG-----AQLLMVPRRP GYGTSGRITIKLQANFFEMDIPKID IYHYELDIKPEKCPRRVNREIVEHVM     | 71 |
| #31  | -MYSGAGPALAPPAPPPP IQGYAFKPPPRDFGTSGRITIKLQANFFEMDIPKID IYHYELDIKPEKCPRRVNREIVEHVM | 79 |
| #32  | -MYSGAGPALAPPAPPPP IQGYAFKPPPRDFGTSGRITIKLQANFFEMDIPKID IYHYELDIKPEKCPRRVNREIVEHVM | 79 |
| #33  | MEAGPSGAAAGAYLPP---LQQVFQAPRRPGIGTVGKPIKLLANYFEVDIPKIDVYHYEVDIKPDKCPRRVNREVVDSTMV  | 77 |
| #34  | --MEALGPGP-----PASLFQPPRRPGLGTGKPIRLLANHFQVQIPKIDVYHYDVIDIKPEKRRRVNREVVDTMV        | 69 |
| #38  | MEAGPSGAAAGAYLPP---LQQVFQAPRRPGIGTVGKPIKLLANYFEVDIPKIDVYHYEVDIKPDKCPRRVNREVVEYMV   | 77 |

Motif I

|          |                                                                                     |     |
|----------|-------------------------------------------------------------------------------------|-----|
| <b>N</b> |                                                                                     |     |
| Ago1     | QHFKPQIFGDRKPVYDGRKNLYTAMPLP IGRDVELEVTIPGEG-KDRIFKVISIKWLAIVSWRMLHEALVSGQIP----    | 151 |
| Ago2     | QHFKTQIFGDRKPVDFGRKNLYTAMPLP IGRDKVELEVTIPGEG-KDRIFKVISIKWVSCVSLQALHDALSGRLPS----   | 153 |
| Ago3     | QHFKVTIFGDRRPFVYDGRKSLYTANPLP VATTGVDLDVTLPGEGGKDRPFKVISIKFVSRVSWHLLHEVLTGRTLPEPLEL | 151 |
| Ago4     | RHFQMIFGDRQPGYDGRKNMYTAHPLP IGRDRVMEVTLPGEG-KDQTFKVSQVWVSVVSLQLLLEALAGHLN----       | 142 |
| #1       | RHFQMIFGDRQPGYDGRKNMYTAHPLP IGRDRVMEVTLPGEG-KDQTFKVSQVWVSVVSLQLLLEALAGHLN----       | 142 |
| #3       | QHFKTQIFGDRKPVDFGRKNLYTAMPLP IGRDKVELEVTIPGEG-KDRIFKVISIKWVSCVSLQALHDALSGRLPS----   | 153 |
| #5       | QHFKPQIFGDRKPVYDGRKNLYTAMPLP ICNERVDFEVTIPGEG-KDRIFKVISIKWLAIVSWRMLHEALVSGQIP----   | 151 |
| #7       | QHFKVTIFGDRRPFVYDGRKSLYTANPLP VATTGVDLDVTLPGEGGKDRPFKVISIKFVSRVSWHLLHEVLTGRTLPEPLEL | 151 |
| #14      | QHFKTQIFGDRKPVDFGRKNLYTAMPLP IGRDKVELEVTIPGEG-KDRIFKVISIKWLAIVSWRMLHEALVSGQIP----   | 145 |
| #31      | QHFKTQIFGDRKPVDFGRKNLYTAMPLP IGRDKVELEVTIPGEG-KDRIFKVISIKWVSCVSLQALHDALSGRLPS----   | 153 |
| #32      | QHFKTQIFGDRKPVDFGRKNLYTAMPLP IGRDKVELEVTIPGEG-KDRIFKVISIKWVSCVSLQALHDALSGRLPS----   | 153 |
| #33      | QHFKVTIFGDRRPFVYDGRKNLYTAMPLP IGRDRVMEVTLPGEG-KDQTFKVSQVWVSVVSLQLLLEALAGHLN----     | 151 |
| #34      | RHFQMIFGDRQPGYDGRKNMYTAHPLP IGRDRVMEVTLPGEG-KDQTFKVSQVWVSVVSLQLLLEALAGHLN----       | 142 |
| #38      | QHFKPQIFGDRKPVDFGRKNLYTAMPLP IGRDKVELEVTIPGEG-KDRIFKVISIKWVSCVSLQALHDALSGRLPS----   | 151 |

Motif II

|           |                                                                                 |     |
|-----------|---------------------------------------------------------------------------------|-----|
| <b>L1</b> |                                                                                 |     |
| Ago1      | ---VPLESVQALDVAMRHLASMRYPVGRSFFSPPEGYHPLGGGREVWVGFHQSVRPAMWKMLNIDVSAFAYKAQPV    | 228 |
| Ago2      | ---VPFETIQALDVVMRHLPSMRYPVGRSFFTASEGCSNP LGGGREVWVGFHQSVRPSLWKMLNIDVSAFAYKAQPV  | 230 |
| Ago3      | DKPISTNPVHAVDVVLRHLPSMKYTPVGRSFFSAPEGYDHP LGGGREVWVGFHQSVRPAMWKMLNIDVSAFAYKAQPV | 231 |
| Ago4      | --EVPDSDVQALDVITRHLPSMRYPVGRSFFSPPEGYHPLGGGREVWVGFHQSVRPAMWNMLNIDVSAFAYRAQPI    | 220 |
| #1        | --EVPDSDVQALDVITRHLPSMRYPVGRSFFSPPEGYHPLGGGREVWVGFHQSVRPAMWNMLNIDVSAFAYRAQPI    | 220 |
| #3        | ---VPFETIQALDVVMRHLPSMRYPVGRSFFTASEGCSNP LGGGREVWVGFHQSVRPSLWKMLNIDVSAFAYKAQPV  | 230 |
| #5        | ---VPLESVQALDVAMRHLASMRYPVGRSFFSPPEGYHPLGGGREVWVGFHQSVRPAMWKMLNIDVSAFAYKAQPV    | 228 |
| #7        | DKPISTNPVHAVDVVLRHLPSMKYTPVGRSFFSAPEGYDHP LGGGREVWVGFHQSVRPAMWKMLNIDVSAFAYKAQPV | 231 |
| #14       | ---VPLESVQALDVAMRHLASMRYPVGRSFFSPPEGYHPLGGGREVWVGFHQSVRPAMWKMLNIDVSAFAYKAQPV    | 222 |
| #31       | ---VPFETIQALDVVMRHLPSMRYPVGRSFFTASEGCSNP LGGGREVWVGFHQSVRPSLWKMLNIDVSAFAYKAQPV  | 230 |
| #32       | ---VPFETIQALDVVMRHLPSMRYPVGRSFFSPPEGYHPLGGGREVWVGFHQSVRPSLWKMLNIDVSAFAYKAQPV    | 230 |
| #33       | ---VPLGVSQALDVAMRHLASMRYPVGRSFFSPPEGYHPLGGGREVWVGFHQSVRPAMWKMLNIDVSAFAYKAQPV    | 228 |
| #34       | --EVPDSDVQALDVITRHLPSMRYPVGRSFFSPPEGYHPLGGGREVWVGFHQSVRPAMWNMLNIDVSAFAYRAQPI    | 220 |
| #38       | ---VPFETIQALDVAMRHLASMRYPVGRSFFSPPEGYHPLGGGREVWVGFHQSVRPAMWKMLNIDVSAFAYKAQPV    | 228 |

PAZ

|      |                                                                                 |     |
|------|---------------------------------------------------------------------------------|-----|
| Ago1 | IEFMCEVLDIRNIDEQPKPLTDSQRVRFKTEIKGLKVEVTHCGQMKRKYRVCNTRRPASHQTFPLQLESQQTVECTVAQ | 308 |
| Ago2 | IEFVCEVLDFKSIEEQKPLTDSQRVKFTEIKGLKVEITHCGQMKRKYRVCNTRRPASHQTFPLQQESQQTVECTVAQ   | 310 |
| Ago3 | IQFMCEVLDIHNIDEQPRPLTDSHRVKFTEIKGLKVEVTHCGQMKRKYRVCNTRRPASHQTFPLQLENGQTVERTVAQ  | 311 |
| Ago4 | IEFMCEVLDIQNINEQTKPLTDSQRVKFTEIKGLKVEVTHCGQMKRKYRVCNTRRPASHQTFPLQLENGQAMECTVAQ  | 300 |
| #1   | IEFMCEVLDIQNINEQTKPLTDSQRVKFTEIKGLKVEVTHCGQMKRKYRVCNTRRPASHQTFPLQLENGQAMECTVAQ  | 300 |
| #3   | IEFMCEVLDIRNIDEQPKPLTDSQRVRFKTEIKGLKVEVTHCGQMKRKYRVCNTRRPASHQTFPLQQESQQTVECTVAQ | 310 |
| #5   | IQFMCEVLDIHNIDEQPRPLTDSHRVKFTEIKGLKVEVTHCGQMKRKYRVCNTRRPASHQTFPLQLENGQTVERTVAQ  | 308 |
| #7   | IQFMCEVLDIHNIDEQPRPLTDSHRVKFTEIKGLKVEVTHCGQMKRKYRVCNTRRPASHQTFPLQLENGQTVERTVAQ  | 311 |
| #14  | IEFVCEVLDFKSIEEQKPLTDSQRVKFTEIKGLKVEVTHCGQMKRKYRVCNTRRPASHQTFPLQQENGQAMECTVAQ   | 302 |
| #31  | IEFVCEVLDFKSIEEQKPLTDSQRVKFTEIKGLKVEVTHCGQMKRKYRVCNTRRPASHQTFPLQQESQQTVECTVAQ   | 310 |
| #32  | IEFVCEVLDFKSIEEQKPLTDSQRVKFTEIKGLKVEVTHCGQMKRKYRVCNTRRPASHQTFPLQQESQQTVECTVAQ   | 310 |
| #33  | IQFMCEVLDIHNIDEQPRPLTDSHRVKFTEIKGLKVEVTHCGQMKRKYRVCNTRRPASHQTFPLQLENGQTVERTVAQ  | 308 |
| #34  | IEFMCEVLDIQNINEQTKPLTDSQRVKFTEIKGLKVEVTHCGQMKRKYRVCNTRRPASHQTFPLQLENGQAVECTVAQ  | 300 |
| #38  | IEFMCEVLDIRNIDEQPKPLTDSQRVRFKTEIKGLKVEVTHCGQMKRKYRVCNTRRPASHQTFPLQQESQQTVECTVAQ | 308 |

L2

|      |                                                                                   |     |
|------|-----------------------------------------------------------------------------------|-----|
| Ago1 | YFKQKYNLQKYPHLPCLQVQGEQKHTYLP LEVCNIVAGQRCIKKLTNDQSTMIKATARSAPDRQEEISRILMKNASYN-  | 387 |
| Ago2 | YFKDRHKLVLRYPHLPCLQVQGEQKHTYLP LEVCNIVAGQRCIKKLTNDQSTMIKATARSAPDRQEEISRILMRSASFN- | 389 |
| Ago3 | YFREKYLTLQKYPHLPCLQVQGEQKHTYLP LEVCNIVAGQRCIKKLTNDQSTMIKATARSAPDRQEEISRILVRSANYE- | 390 |
| Ago4 | YFKQKYSLQKYPHLPCLQVQGEQKHTYLP LEVCNIVAGQRCIKKLTNDQSTMIKATARSAPDRQEEISRILVKSNSMVG  | 380 |
| #1   | YFKQKYSLQKYPHLPCLQVQGEQKHTYLP LEVCNIVAGQRCIKKLTNDQSTMIKATARSAPDRQEEISRILVKSNSMVG  | 380 |
| #3   | YFKDRHKLVLRYPHLPCLQVQGEQKHTYLP LEVCNIVAGQRCIKKLTNDQSTMIKATARSAPDRQEEISRILMRSASFN- | 389 |
| #5   | YFKQKYNLQKYPHLPCLQVQGEQKHTYLP LEVCNIVAGQRCIKKLTNDQSTMIKATARSAPDRQEEISRILMKNASYN-  | 387 |
| #7   | YFKDRHKLVLRYPHLPCLQVQGEQKHTYLP LEVCNIVAGQRCIKKLTNDQSTMIKATARSAPDRQEEISRILMKNASYN- | 390 |
| #14  | YFKQKYSLQKYPHLPCLQVQGEQKHTYLP LEVCNIVAGQRCIKKLTNDQSTMIKATARSAPDRQEEISRILVKSNSMVG  | 382 |
| #31  | YFKQKYSLQKYPHLPCLQVQGEQKHTYLP LEVCNIVAGQRCIKKLTNDQSTMIKATARSAPDRQEEISRILVKSNSMVG  | 390 |
| #32  | YFKQKYNLQKYPHLPCLQVQGEQKHTYLP LEVCNIVAGQRCIKKLTNDQSTMIKATARSAPDRQEEISRILVRSANYE-  | 389 |
| #33  | YFREKYLTLQKYPHLPCLQVQGEQKHTYLP LEVCNIVAGQRCIKKLTNDQSTMIKATARSAPDRQEEISRILVRSANYE- | 387 |
| #34  | YFKDRHKLVLRYPHLPCLQVQGEQKHTYLP LEVCNIVAGQRCIKKLTNDQSTMIKATARSAPDRQEEISRILMRSASFN- | 379 |
| #38  | YFKQKYSLQKYPHLPCLQVQGEQKHTYLP LEVCNIVAGQRCIKKLTNDQSTMIKATARSAPDRQEEISRILVRSANYE-  | 387 |

Supplementary Figure 7 Grimm - continued

L2

|      |                                                                                     |     |
|------|-------------------------------------------------------------------------------------|-----|
| Ago1 | -LDPYIQEFGIKVKDDMTEVTGRVLPAPILQYGGRRNRAIATPNQGVWDMRGKQFYNGIEIKVWAIACFAPQKQCREEVLK   | 466 |
| Ago2 | -TDPYVREFGIMVKDEMTDVTGRVLPQPPSILYGGRRNKAIAITPVQGVWDMRNKQFHTGIEIKVWAIACFAPQRQCTEVHLK | 468 |
| Ago3 | -TDPFVQEFQFKVRDEMAHVTGRVLPAPMLQYGGRRNRTVATPSHGVDWDMRGKQFHTGVEIKMWAIACFATQRQCREEILK  | 469 |
| Ago4 | GPDPYLKEFGIVVHNEMTELTGRVLPAPMLQYGGRRNRTVATPNQGVWDMRGKQFYAGIEIKVWAVACFAPQKQCREDDLK   | 460 |
| #1   | GPDPYLKEFGIVVHNEMTELTGRVLPAPMLQYGGRRNRTVATPNQGVWDMRGKQFYAGIEIKVWAVACFATQRQCREEILK   | 460 |
| #3   | -TDPYVREFGIMVKDEMTDVTGRVLPQPPSILYGGRRNKAIAITPVQGVWDMRNKQFHTGIEIKVWAIACFAPQKQCREEVLK | 468 |
| #5   | -LDPYIQEFGIKVKDDMTEVTGRVLPAPILQYGGRRNRTVATPSHGVDWDMRGKQFHTGVEIKMWAIACFATQRQCREEILK  | 466 |
| #7   | -LDPYIQEFGIKVKDDMTEVTGRVLPAPILQYGGRRNRAIATPNQGVWDMRGKQFYNGIEIKVWAIACFAPQKQCREEVLK   | 469 |
| #14  | GPDPYLKEFGIVVHNEMTELTGRVLPAPMLQYGGRRNRTVATPNQGVWDMRGKQFYAGIEIKVWAVACFAPQKQCREDDLK   | 462 |
| #31  | GPDPYLKEFGIVVHNEMTELTGRVLPAPMLQYGGRRNRTVATPNQGVWDMRGKQFYAGIEIKVWAVACFAPQKQCREDDLK   | 470 |
| #32  | -TDPFVQEFQFKVRDEMAHVTGRVLPAPMLQYGGRRNRAIATPSHGVDWDMRGKQFHTGVEIKMWAIACFATQRQCREEILK  | 468 |
| #33  | -TDPFVQEFQFKVRDEMAHVTGRVLPAPMLQYGGRRNRTVATPSHGVDWDMRGKQFHTGVEIKMWAIACFATQRQCREEILK  | 466 |
| #34  | -TDPYVREFGIMVKDEMTDVTGRVLPQPPSILYGGRRNKAIAITPVQGVWDMRNKQFHTGIEIKVWAIACFAPQRQCTEVHLK | 458 |
| #38  | -TDPFVQEFQFKVRDEMAHVTGRVLPAPMLQYGGRRNRTVATPNQGVWDMRGKQFHTGVEIKMWAIACFATQRQCREEILK   | 466 |

MID

|      |                                                                                    |     |
|------|------------------------------------------------------------------------------------|-----|
| Ago1 | NFTDQLRKISKDAGMPIQQQPCFKYAQGADSVPEPMFRHLKNTYSGLQLIIVILPGKTPVYAEVKRVGDTLLGMATQCVQ   | 546 |
| Ago2 | SFTEQLRKISRDA GMP IQGQPCFKYAQGADSVPEPMFRHLKNTYAGLQLVVILPGKTPVYAEVKRVGDTVLGMATQCVQ  | 548 |
| Ago3 | GFTDQLRKISKDAGMPIQQQPCFKYAQGADSVPEPMFRHLKNTYSGLQLIIVILPGKTPVYAEVKRVGDTLLGMATQCVQ   | 549 |
| Ago4 | SFTDQLRKISKDAGMPIQQQPCFKYAQGADSVPEPMFRHLKNTYVGLQLIIVVILPGKTPVYAEVKRVGDTLLGMATQCVQ  | 540 |
| #1   | GFTDQLRKISKDAGMPIQQQPCFKYAQGADSVPEPMFRHLKNTYSGLQLIIVILPGKTPVYAEVKRVGDTLLGMATQCVQ   | 540 |
| #3   | NFTDQLRKISKDAGMPIQQQPCFKYAQGADSVPEPMFRHLKNTYSGLQLIIVILPGKTPVYAEVKRVGDTLLGMATQCVQ   | 548 |
| #5   | GFTDQLRKISKDAGMPIQQQPCFKYAQGADSVPEPMFRHLKNTYSGLQLIIVILPGKTPVYAEVKRVGDTLLGMATQCVQ   | 546 |
| #7   | NFTDQLRKISKDAGMPIQQQPCFKYAQGADSVPEPMFRHLKNTYSGLQLIIVVILPGKTPVYAEVKRVGDTLLGMATQCVQ  | 549 |
| #14  | SFTDQLRKISKDAGMPIQQQPCFKYAQGADSVPEPMFRHLKNTYVGLQLIIVVILPGKTPVYAEVKRVGDTLLGMATQCVQ  | 542 |
| #31  | SFTDQLRKISKDAGMPIQQQPCFKYAQGADSVPEPMFRHLKNTYSGLQLIIVILPGKTPVYAEVKRVGDTLLGMATQCVQ   | 550 |
| #32  | GFTDQLRKISKDAGMPIQQQPCFKYAQGADSVPEPMFRHLKNTYAGLQLVVILPGKTPVYAEVKRVGDTVLGMATQCVQ    | 548 |
| #33  | GFTDQLRKISKDAGMPIQQQPCFKYAQGADSVPEPMFRHLKNTYSGLQLIIVILPGKTPVYAEVKRVGDTLLGMATQCVQ   | 546 |
| #34  | SFTEQLRKISRDA GMP IQGQPCFKYAQGADSVPEPMFRHLKNTYSGLQLIIVILPGKTPVYAEVKRVGDTLLGMATQCVQ | 538 |
| #38  | GFTDQLRKISKDAGMPIQQQPCFKYAQGADSVPEPMFRHLKNTYSGLQLIIVILPGKTPVYAEVKRVGDTLLGMATQCVQ   | 546 |

|      |                                                                                 |     |
|------|---------------------------------------------------------------------------------|-----|
| Ago1 | VKNVVKTSPTLSNLCLKINVKLGGINNILVPHQRSVVFQQPVIFLGADVTHPPAGDGKKPSIAAVVGSMDAHPNRYCAT | 626 |
| Ago2 | MKNVQRTTPTLSNLCLKINVKLGGVNNILLPQGRPPVFQQPVIFLGADVTHPPAGDGKKPSIAAVVGSMDAHPNRYCAT | 628 |
| Ago3 | VKNVVKTSPTLSNLCLKINVKLGGINNILVPHQRSVVFQQPVIFLGADVTHPPAGDGKKPSIAAVVGSMDAHPNRYCAT | 629 |
| Ago4 | VKNVVKTSPTLSNLCLKINAKLGGINNVLVPHQRSVVFQQPVIFLGADVTHPPAGDGKKPSIAAVVGSMDGHPNRYCAT | 620 |
| #1   | VKNVVKTSPTLSNLCLKINVKLGGINNILVPHQRSVVFQQPVIFLGADVTHPPAGDGKKPSIAAVVGSMDAHPNRYCAT | 620 |
| #3   | VKNVVKTSPTLSNLCLKINVKLGGINNILLPQGRPPVFQQPVIFLGADVTHPPAGDGKKPSIAAVVGSMDAHPNRYCAT | 628 |
| #5   | MKNVQRTTPTLSNLCLKINVKLGGINNILVPHQRSVVFQQPVIFLGADVTHPPAGDGKKPSIAAVVGSMDAHPNRYCAT | 626 |
| #7   | VKNVVKTSPTLSNLCLKINAKLGGINNVLVPHQRSVVFQQPVIFLGADVTHPPAGDGKKPSIAAVVGSMDAHPNRYCAT | 622 |
| #14  | MKNVQRTTPTLSNLCLKINVKLGGVNNILLPQGRPPVFQQPVIFLGADVTHPPAGDGKKPSIAAVVGSMDAHPNRYCAT | 629 |
| #31  | VKNVVKTSPTLSNLCLKINAKLGGINNVLVPHQRSVVFQQPVIFLGADVTHPPAGDGKKPSIAAVVGSMDAHPNRYCAT | 630 |
| #32  | MKNVQRTTPTLSNLCLKINVKLGGIYNILVPHQRSVVFQQPVIFLGADVTHPPAGDGKKPSIAAVVGSMDAHPNRYCAT | 628 |
| #33  | VKNVVKTSPTLSNLCLKINVKLGGINNILVPHQRSVVFQQPVIFLGADVTHPPAGDGKKPSIAAVVGSMDAHPNRYCAT | 626 |
| #34  | VKNVVKTSPTLSNLCLKINAKLGGINNVLVPHQRSVVFQQPVIFLGADVTHPPAGDGKKPSIAAVVGSMDGHPNRYCAT | 618 |
| #38  | VKNVVKTSPTLSNLCLKINVKLGGINNILVPHQRSVVFQQPVIFLGADVTHPPAGDGKKPSIAAVVGSMDAHPNRYCAT | 626 |

PIWI

|      |                                                                                   |     |
|------|-----------------------------------------------------------------------------------|-----|
| Ago1 | VRVQRPRQ-----EIIEDLSYMVRELLIQFYKSTRFKPTRIIFYRDGVPEGQLPQILHYELLAIRDACIKLEKDY       | 696 |
| Ago2 | VRVQQHRQ-----EIIQDLAMVRELLIQFYKSTRFKPTRIIFYRDGVSEGQFQVLLHHELLAIREACIKLEKDY        | 698 |
| Ago3 | VRVQRPRQ-----EIIQDLASVRELLIQFYKSTRFKPTRIIFYRDGVSEGQFRQVLYHELLAIREACIKLEKDY        | 699 |
| Ago4 | VRVQTSRQEIISQELLYSCEVIQDLTNMVRELLIQFYKSTRFKPTRIIFYRGGVSEGQMKQVAWPELIAIRKACISLEEDY | 700 |
| #1   | VRVQRPRQ-----EIIQDLASVRELLIQFYKSTRFKPTRIIFYRDGVSEGQFRQVLYHELLAIRDACIKLEKDY        | 690 |
| #3   | VRVQRPRQ-----EIIQDLAMVRELLIQFYKSTRFKPTRIIFYRDGVSEGQFQVLLHHELLAIREACIKLEKDY        | 698 |
| #5   | VRVQQHRQ-----EIIQDLAMVRELLIQFYKSTRFKPTRIIFYRDGVSEGQFQVLLHHELLAIREACIKLEKDY        | 696 |
| #7   | VRVQRPRQ-----EIIQDLASVRELLIQFYKSTRFKPTRIIFYRDGVSEGQFRQVLYHELLAIREACISLEKDY        | 699 |
| #14  | VRVQQHRQ-----EIIQDLAMVRELLIQFYKSTRFKPTRIIFYRDGVPEGQLPQILHYELLAIRDACIKLEKDY        | 692 |
| #31  | VRVQRPRQ-----EIIEDLSYMVRELLIQFYKSTRFKPTRIIFYRDGVPEGQLPQILHYELLAIRDACIKLEKDY       | 700 |
| #32  | VRVQRPRQ-----EIIEDLSYMVRELLIQFYKSTRFKPTRIIFYRDGVSEGQFRQVLYHELLAIRDACISLEKDY       | 698 |
| #33  | VRVQRPRQ-----EIIEDLSYMVRELLIQFYKSTRFKPTRIIFYRDGVPEGQLPQILHYELLAIREACIKLEKDY       | 696 |
| #34  | VRVQTSRQEIISQELLYSCEVIQDLTNMVRELLIQFYKSTRFKPTRIIFYRGGVSEGQMKQVAWPELIAIRKACISLEEDY | 698 |
| #38  | VRVQRPRQ-----EIIQDLASVRELLIQFYKSTRFKPTRIIFYRDGVSEGQFRQVLYHELLAIREACISLEKDY        | 696 |

|      |                                                                                  |     |
|------|----------------------------------------------------------------------------------|-----|
| Ago1 | QPGITYIVVQKRHHTRLFCADKNERIGKSGNIPAGTTVDTNITHPEFDFYLCSHAGIQGTSRPSHYVWLWDDNRFSTADE | 776 |
| Ago2 | QPGITFIVVQKRHHTRLFCADKNERIGKSGNIPAGTTVDTKITHPEFDFYLCSHAGIQGTSRPSHYVWLWDDNRFSSDE  | 778 |
| Ago3 | QPGITYIVVQKRHHTRLFCADRTERVGRSGNIPAGTTVDTDITHPEFDFYLCSHAGIQGTSRPSHYVWLWDDNCFSTADE | 779 |
| Ago4 | RPGITYIVVQKRHHTRLFCADKTERVGRSGNIPAGTTVDSTITHPEFDFYLCSHAGIQGTSRPSHYVWLWDDNCFSTADE | 780 |
| #1   | QPGITFIVVQKRHHTRLFCADKNERIGKSGNIPAGTTVDTNITHPEFDFYLCSHAGIQGTSRPSHYVWLWDDNRFSSDE  | 770 |
| #3   | QPGITFIVVQKRHHTRLFCADKNERIGKSGNIPAGTTVDTNITHPEFDFYLCSHAGIQGTSRPSHYVWLWDDNRFSTADE | 778 |
| #5   | QPGITFIVVQKRHHTRLFCADKNERIGKSGNIPAGTTVDTKITHPEFDFYLCSHAGIQGTSRPSHYVWLWDDNRFSSDE  | 776 |
| #7   | QPGITYIVVQKRHHTRLFCADRTERVGRSGNIPAGTTVDTDITHPEFDFYLCSHAGIQGTSRPSHYVWLWDDNCFSTADE | 779 |
| #14  | QPGITYIVVQKRHHTRLFCADKNERIGKSGNIPAGTTVDTNITHPEFDFYLCSHAGIQGTSRPSHYVWLWDDNRFSTADE | 772 |
| #31  | QPGITYIVVQKRHHTRLFCADKTERVGRSGNIPAGTTVDSTITHPEFDFYLCSHAGIQGTSRPSHYVWLWDDNCFSTADE | 780 |
| #32  | QPGITYIVVQKRHHTRLFCADRTERVGRSGNIPAGTTVDTDITHPEFDFYLCSHAGIQGTSRPSHYVWLWDDNCFSTADE | 778 |
| #33  | QPGITFIVVQKRHHTRLFCADKNERIGKSGNIPAGTTVDTKITHPEFDFYLCSHAGIQGTSRPSHYVWLWDDNCFSTADE | 776 |
| #34  | QPGITFIVVQKRHHTRLFCADKNERIGKSGNIPAGTTVDTKITHPEFDFYLCSHAGIQGTSRPSHYVWLWDDNCFSTADE | 778 |
| #38  | QPGITYIVVQKRHHTRLFCADRTERVGRSGNIPAGTTVDTDITHPEFDFYLCSHAGIQGTSRPSHYVWLWDDNCFSTADE | 776 |

Supplementary Figure 7 Grimm - continued

|      | PIWI            |               |                                                           |
|------|-----------------|---------------|-----------------------------------------------------------|
| Ago1 | LQILTYQLCHTYVRC | TRSVSIPAPAYYA | RLVAFRARYHLVDKEHDSGEGSHISGQSNRDPQALAKAVQVHQDTLRRTMYF 856  |
| Ago2 | LQILTYQLCHTYVRC | TRSVSIPAPAYYA | HLVAFRARYHLVDKEHDSAEGSHISGQSNRDPQALAKAVQVHQDTLRRTMYF 858  |
| Ago3 | LQLLTYQLCHTYVRC | TRSVSIPAPAYYA | HLVAFRARYHLVDKEHDSAEGSHVSGQSNRDPQALAKAVQIHQDTLRRTMYF 859  |
| Ago4 | LQLLTYQLCHTYVRC | TRSVSIPAPAYYA | RLVAFRARYHLVDKDHDSAEGSHVSGQSNRDPQALAKAVQIHQDTLRRTMYF 860  |
| #1   | LQILTYQLCHTYVRC | TRSVSIPAPAYYA | RLVAFRARYHLVDKEHDSGEGSHISGQSNRDPQALAKAVQVHQDTLRRTMYF 850  |
| #3   | LQILTYQLCHTYVRC | TRSVSIPAPAYYA | HLVAFRARYHLVDKEHDSAEGSHVSGQSNRDPQALAKAVRQVHQDTLRRTMYF 858 |
| #5   | LQILTYQLCHTYVRC | TRSVSIPAPAYYA | HLVAFRARYHLVDKEHDSAEGSHVSGQSNRDPQALAKAVQIHQDTLRRTMYF 856  |
| #7   | LQLLTYQLCHTYVRC | TRSVSIPAPAYYA | HLVAFRARYHLVDKDHDSAEGSHVSGQSNRDPQALAKAVQIHQDTLRRTMYF 859  |
| #14  | LQILTYQLCHTYVRC | TRSVSIPAPAYYA | HLVAFRARYHLVDKEHDSGEGSHISGQSNRDPQALAKAVQVHQDTLRRTMYF 852  |
| #31  | LQLLTYQLCHTYVRC | TRSVSIPAPAYYA | RLVAFRARYHLVDKEHDSGEGSHISGQSNRDPQALAKAVRQVHQDTLRRTMYF 860 |
| #32  | LQLLTYQLCHTYVRC | TRSVSIPAPAYYA | HLVAFRARYHLVDKEHDSAEGSHISGQSNRDPQALAKAVQVHQDTLRRTMYF 858  |
| #33  | LQLLTYQLCHTYVRC | TRSVSIPAPAYYA | RLVAFRARYHLVDKDHDSAEGSHVSGQSNRDPQALAKAVQIHQDTLRRTMYF 856  |
| #34  | LQLLTYQLCHTYVRC | TRSVSIPAPAYYA | HLVAFRARYHLVDKEHDSAEGSHVSGQSNRDPQALAKAVQIHQDTLRRTMYF 858  |
| #38  | LQLLTYQLCHTYVRC | TRSVSIPAPAYYA | HLVAFRARYHLVDKEHDSAEGSHVSGQSNRDPQALAKAVQIHQDTLRRTMYF 856  |

  

|      |   |     |
|------|---|-----|
| Ago1 | A | 857 |
| Ago2 | A | 859 |
| Ago3 | A | 860 |
| Ago4 | A | 861 |
| #1   | A | 851 |
| #3   | A | 859 |
| #5   | A | 857 |
| #7   | A | 860 |
| #14  | A | 853 |
| #31  | A | 861 |
| #32  | A | 859 |
| #33  | A | 857 |
| #34  | A | 859 |
| #38  | A | 857 |

**Supplementary Fig. 7** Alignments (generated using ClustalX2) of parental Ago and selected chimeric sequences.

(a) Chimeras tested in the luciferase and slicer assays in **Fig. 1e** and the tethering assay in **Supplementary Fig. 1h**. (b) The eight Ago2–Ago3 chimeras with the strongest Ago2-like phenotype (see **Fig. 1d,f**). (c) Ago1–4 chimeras tested in the luciferase assays in **Fig. 5c**. Regions identical in all sequences are marked in gray and unique positions in white. Residues constituting the catalytic tetrad are highlighted by red frames and an asterisk. Sequences encompassing motif I and motif II are framed in orange. The Ago domain structure is depicted above the alignment.

**Supplementary Table 1** Template and primer combinations used to generate fragments for OE-PCRs

| mutant                                                      | PCR fragment | template            | forward primer | reverse primer |
|-------------------------------------------------------------|--------------|---------------------|----------------|----------------|
| N <sub>3</sub> P <sub>2</sub> M <sub>2</sub> P <sub>2</sub> | 5'           | Ago3                | #459           | #505           |
|                                                             | 3'           | Ago2                | #506           | #517           |
| N <sub>2</sub> P <sub>3</sub> M <sub>3</sub> P <sub>3</sub> | 5'           | Ago2                | #459           | #505           |
|                                                             | 3'           | Ago3                | #506           | #517           |
| Ago3I <sub>2</sub> II <sub>2</sub>                          | 5'           | Ago3II <sub>2</sub> | #459           | #521           |
|                                                             | 3'           | Ago3II <sub>2</sub> | #520           | #517           |
| Ago2II <sub>3</sub>                                         | 5'           | Ago2                | #459           | #513           |
|                                                             | middle       | Ago3                | #514           | #505           |
|                                                             | 3'           | Ago2                | #506           | #517           |
| Ago3II <sub>2</sub>                                         | 5'           | Ago3                | #459           | #515           |
|                                                             | middle       | Ago2                | #516           | #505           |
|                                                             | 3'           | Ago3                | #506           | #517           |
| Ago2I <sub>AAAAA</sub>                                      | 5'           | Ago2                | #459           | #523           |
|                                                             | 3'           | Ago2                | #522           | #517           |
| Ago2F44A                                                    | 5'           | Ago2                | #459           | #539           |
|                                                             | 3'           | Ago2                | #538           | #517           |
| Ago2E46A                                                    | 5'           | Ago2                | #459           | #541           |
|                                                             | 3'           | Ago2                | #540           | #517           |
| Ago2M47A                                                    | 5'           | Ago2                | #459           | #543           |
|                                                             | 3'           | Ago2                | #542           | #517           |
| Ago2D48A                                                    | 5'           | Ago2                | #459           | #545           |
|                                                             | 3'           | Ago2                | #544           | #517           |
| Ago3I <sub>2</sub>                                          | 5'           | Ago3                | #459           | #521           |
|                                                             | 3'           | Ago3                | #520           | #517           |
| Ago3I <sub>Met</sub> II <sub>2</sub>                        | 5'           | Ago3II <sub>2</sub> | #459           | #581           |
|                                                             | 3'           | Ago3II <sub>2</sub> | #580           | #517           |
| N <sub>1</sub> P <sub>2</sub> M <sub>2</sub> P <sub>2</sub> | 5'           | Ago1                | #459           | #505           |
|                                                             | 3'           | Ago2                | #506           | #517           |
| N <sub>3</sub> P <sub>2</sub> M <sub>2</sub> P <sub>2</sub> | 5'           | Ago3                | #459           | #505           |
|                                                             | 3'           | Ago2                | #506           | #517           |
| N <sub>4</sub> P <sub>2</sub> M <sub>2</sub> P <sub>2</sub> | 5'           | Ago4                | #459           | #505           |
|                                                             | 3'           | Ago2                | #506           | #517           |
| N <sub>1</sub> P <sub>3</sub> M <sub>3</sub> P <sub>3</sub> | 5'           | Ago1                | #459           | #505           |
|                                                             | 3'           | Ago3                | #506           | #517           |
| N <sub>2</sub> P <sub>3</sub> M <sub>3</sub> P <sub>3</sub> | 5'           | Ago2                | #459           | #505           |
|                                                             | 3'           | Ago3                | #506           | #517           |
| N <sub>4</sub> P <sub>3</sub> M <sub>3</sub> P <sub>3</sub> | 5'           | Ago4                | #459           | #505           |
|                                                             | 3'           | Ago3                | #506           | #517           |
| N <sub>1</sub> P <sub>1</sub> M <sub>1</sub> P <sub>2</sub> | 5'           | Ago1                | #459           | #525           |



|                                                                                  |        |                                                                             |      |      |
|----------------------------------------------------------------------------------|--------|-----------------------------------------------------------------------------|------|------|
|                                                                                  | 3'     | Ago2                                                                        | #524 | #517 |
| N <sub>3</sub> P <sub>3</sub> M <sub>3</sub> P <sub>2</sub>                      | 5'     | Ago3                                                                        | #459 | #525 |
|                                                                                  | 3'     | Ago2                                                                        | #524 | #517 |
| N <sub>4</sub> P <sub>4</sub> M <sub>4</sub> P <sub>2</sub>                      | 5'     | Ago4                                                                        | #459 | #525 |
|                                                                                  | 3'     | Ago2                                                                        | #524 | #517 |
| N <sub>1</sub> P <sub>1</sub> M <sub>1</sub> P <sub>3</sub>                      | 5'     | Ago1                                                                        | #459 | #525 |
|                                                                                  | 3'     | Ago3                                                                        | #524 | #517 |
| N <sub>2</sub> P <sub>2</sub> M <sub>2</sub> P <sub>3</sub>                      | 5'     | Ago2                                                                        | #459 | #525 |
|                                                                                  | 3'     | Ago3                                                                        | #524 | #517 |
| N <sub>4</sub> P <sub>4</sub> M <sub>4</sub> P <sub>3</sub>                      | 5'     | Ago4                                                                        | #459 | #525 |
|                                                                                  | 3'     | Ago3                                                                        | #524 | #517 |
| Ago1 <sub>DEDH</sub>                                                             | 5'     | Ago1                                                                        | #459 | #500 |
|                                                                                  | 3'     | Ago1                                                                        | #499 | #517 |
| Ago4 <sub>DEDH</sub>                                                             | 5'     | Ago4                                                                        | #459 | #502 |
|                                                                                  | middle | Ago4                                                                        | #501 | #504 |
|                                                                                  | 3'     | Ago4                                                                        | #503 | #517 |
| N <sub>2</sub> P <sub>1</sub> M <sub>1</sub> P <sub>1</sub> <sub>DEDH</sub>      | 5'     | Ago2                                                                        | #459 | #505 |
|                                                                                  | 3'     | Ago1 <sub>DEDH</sub>                                                        | #506 | #517 |
| N <sub>2</sub> P <sub>4</sub> M <sub>4</sub> P <sub>4</sub> <sub>DEDH</sub>      | 5'     | Ago2                                                                        | #459 | #505 |
|                                                                                  | 3'     | Ago4 <sub>DEDH</sub>                                                        | #506 | #517 |
| N <sub>2</sub> P <sub>2</sub> M <sub>2</sub> P <sub>1</sub> <sub>DEDH</sub>      | 5'     | Ago2                                                                        | #459 | #525 |
|                                                                                  | 3'     | Ago1 <sub>DEDH</sub>                                                        | #524 | #517 |
| N <sub>2</sub> P <sub>2</sub> M <sub>2</sub> P <sub>4</sub> <sub>DEDH</sub>      | 5'     | Ago2                                                                        | #459 | #525 |
|                                                                                  | 3'     | Ago4 <sub>DEDH</sub>                                                        | #524 | #517 |
| Ago3I <sub>2</sub> II <sub>loop2</sub>                                           | 5'     | Ago3I <sub>2</sub>                                                          | #459 | #772 |
|                                                                                  | 3'     | Ago3I <sub>2</sub>                                                          | #771 | #517 |
| Ago3II <sub>loop2</sub>                                                          | 5'     | Ago3                                                                        | #459 | #772 |
|                                                                                  | 3'     | Ago3                                                                        | #771 | #517 |
| Ago2 <sub>DADH</sub>                                                             | 5'     | Ago2                                                                        | #459 | #855 |
|                                                                                  | 3'     | Ago2                                                                        | #854 | #517 |
| Ago4 <sub>DEDH-10AA</sub>                                                        | 5'     | Ago4 <sub>DEDH</sub>                                                        | #459 | #801 |
|                                                                                  | 3'     | Ago4 <sub>DEDH</sub>                                                        | #800 | #517 |
| N <sub>2</sub> P <sub>2</sub> M <sub>2</sub> P <sub>4</sub> <sub>DEDH-10AA</sub> | 5'     | N <sub>2</sub> P <sub>2</sub> M <sub>2</sub> P <sub>4</sub> <sub>DEDH</sub> | #459 | #801 |
|                                                                                  | 3'     | Ago4 <sub>DEDH</sub>                                                        | #800 | #517 |

**Supplementary Table 2** Primers for cloning and shuffling reactions

|      |                                                                                         |
|------|-----------------------------------------------------------------------------------------|
| #102 | 5' - TCGAGACAAACACCATTGTCACACTCCATCTAGAGC - 3'                                          |
| #103 | 5' - GGCCGCTCTAGATGGAGTGTGACAATGGTGTTTGTC - 3'                                          |
| #189 | 5' - CACCGCCTGACATCGAGGAGGATATTCAAGAGATATCCTCCTCGATGTCAGGC - 3'                         |
| #190 | 5' - AAAAGCCTGACATCGAGGAGGATATCTCTTGAATATCCTCCTCGATGTCAGGC - 3'                         |
| #459 | 5' - GACTACAAGGACGACGATGACAAG - 3'                                                      |
| #460 | 5' - CACTGAATTCTCATCAGGCGAAG - 3'                                                       |
| #499 | 5' - CCTGCCTACTACGCCATCTGGTGGCCTTCCGG - 3'                                              |
| #500 | 5' - CCGGAAGGCCACCAGATGGGCGTAGTAGGCAGG - 3'                                             |
| #501 | 5' - CATCTACTACAGAGACGGCGTGAGCGAGG - 3'                                                 |
| #502 | 5' - CCTCGCTCACGCCGTCTCTGTAGTAGATG - 3'                                                 |
| #503 | 5' - CCTGCCTACTACGCCATCTGGTGGCCTTCCGG - 3'                                              |
| #504 | 5' - CCGGAAGGCCACCAGATGGGCGTAGTAGGCAGG - 3'                                             |
| #505 | 5' - CATGCTGGGCAGGTGCCG - 3'                                                            |
| #506 | 5' - CGGCACCTGCCAGCATG - 3'                                                             |
| #513 | 5' - GCTCACGAACCTTGATGGACACCTTGAAGAT - 3'                                               |
| #514 | 5' - AAGGTGTCCATCAAGTTCGTGAGC - 3'                                                      |
| #515 | 5' - CACCCACTTGATGGACACCTTAAAGG - 3'                                                    |
| #516 | 5' - TCAAGGTGTCCATCAAGTGGGTG - 3'                                                       |
| #517 | 5' - CAATCTTAGCGCAGAAGTCATGC - 3'                                                       |
| #520 | 5' - AACTTCTTCGAGATGGACATCCCCAAGATCGACGTG - 3'                                          |
| #521 | 5' - GTCCATCTCGAAGAAGTTGGCCAGCAGCTTGATGG - 3'                                           |
| #522 | 5' - GCCAACGCCGCCGCTGCCGCCATCCCCAAGATCGACATC - 3'                                       |
| #523 | 5' - GATGGCGGCAGCGGCGGCGTTGGCCTGCAGCTTGAT - 3'                                          |
| #524 | 5' - CAACCTGTGCCTGAAGATCAAC - 3'                                                        |
| #525 | 5' - GTTGATCTTCAGGCACAGGTTG - 3'                                                        |
| #538 | 5' - CAGGCCAACGCCTTCGAGATGGACATCCCCAAGATC - 3'                                          |
| #539 | 5' - CATCTCGAAGGCGTTGGCCTGCAGCTTGATGGTCCG - 3'                                          |
| #540 | 5' - AACTTCTTCGCCATGGACATCCCCAAGATCGACATC - 3'                                          |
| #541 | 5' - GATGTCCATGGCGAAGAAGTTGGCCTGCAGCTTGAT - 3'                                          |
| #542 | 5' - TTCTTCGAGGCCGACATCCCCAAGATCGACATCTAC - 3'                                          |
| #543 | 5' - GGGGATGTGCGCCTCGAAGAAGTTGGCCTGCAGCTT - 3'                                          |
| #544 | 5' - TTCGAGATGGCCATCCCCAAGATCGACATCTACCAC - 3'                                          |
| #545 | 5' - CTTGGGGATGGCCATCTCGAAGAAGTTGGCCTGCAG - 3'                                          |
| #580 | 5' - CTGGCCAACTGCTTCCAGATGGAGATCCCCAAG - 3'                                             |
| #581 | 5' - CTT GGG GAT CTC CAT CTG GAA GCA GTT GGC CAG - 3'                                   |
| #602 | 5' - GGGGACAAGTTTGTACAAAAAAGCAGGCTTCGAAGGAGATAGAACCATGGACTA<br>CAAGGACGACGATGACAAG - 3' |
| #603 | 5' - GGGGACCACTTTGTACAAGAAAGCTGGTCCACTGAATTCTCATCAGGCGAAG - 3'                          |
| #614 | 5' - AATTTAGCGGCCGACGCGTGGTACCTCTAGGATATCGAATTCA - 3'                                   |
| #615 | 5' - GGCCGCAATCAGGATCCATTACGG - 3'                                                      |
| #616 | 5' - GGCCGCAATCAGGATCCATTACGG - 3'                                                      |
| #617 | 5' - AATCCGTAATGGATCCTGATTGC - 3'                                                       |

|      |                                                             |
|------|-------------------------------------------------------------|
| #631 | 5' - GGCCGCATCTTATAATGTGGCGCGCCATTTATATAG - 3'              |
| #632 | 5' - AATTCTATATAAATGGCGCGCCACATTATAAGATGC - 3'              |
| #771 | 5' - CCAGCGTGCCCTTCGAGACCATCCAG GCCGTGGACGTGGTGCTGC - 3'    |
| #772 | 5' - ATGGTCTCGAAGGGCACGCTGGGCAG CCTGCCGGTCAGCACCTCGTGC - 3' |
| #800 | 5' - CAGACCAGCCGGCAGGAAGTGATCCAGGACCTGACC - 3'              |
| #801 | 5' - GTCCTG GATCACTTCCTGCCGGCTGGTCTGCACC - 3'               |
| #854 | 5' - GTGCAGCAGCACCGGCAGGCAATCATTAGGATCTGGCTG - 3'           |
| #855 | 5' - CAGCCAGATCCTGAATGATTGCCTGCCGGTGCTGCTGCAC - 3'          |
| #872 | 5' - TCGACTCGAGTGCTGAAGAACGAGCAGTAATTC - 3'                 |
| #873 | 5' - TCAATGTATCTTATCATGTCTGCTCG - 3'                        |

**Supplementary Table 3** Template and primer pairs used in PCRs for generation of DNA templates for *in vitro* transcription

| <i>in vitro</i> transcript for | template (plasmid) | 5' primer                                            | 3' primer                      |
|--------------------------------|--------------------|------------------------------------------------------|--------------------------------|
| shRen1 and shRen2              | psiCheck2          | 5' - TAATACGACTCACTATAG GCTTCCAAGGTGTACGAC - 3'      | 5' - TCACGGCGTTCTCGGCGTG - 3'  |
| shRen3                         | psiCheck2          | 5' - TAATACGACTCACTATAG GGCTCATATCGCCTCCTGGAT C - 3' | 5' - AACTCTCAGCATGGACG - 3'    |
| shRen4                         | psiCheck2          | 5' - TAATACGACTCACTATAG GACGTGATCGAGTCCTGGGA C - 3'  | 5' - CTCGCCCTTCTCCTTGAATG - 3' |
| miR-122                        | psi2-miR-122perf   | 5' - GAAATTAATACGACTCAC TATAGGCCTCCACTTCAGCCA - 3'   | 5' - CCAACACACAGATGTAATG - 3'  |

**Supplementary Table 4** DNA oligonucleotides used as probes

| probe for        | sequence                         |
|------------------|----------------------------------|
| shRen1 antisense | 5' - GCAACGCAAACGCATGATCAC - 3'  |
| shRen1 sense     | 5' - GTGATCATGCGTTTGCCTTGC - 3'  |
| shRen3 antisense | 5' - GGCCTTTCACTACTCCTACGA - 3'  |
| shRen3 sense     | 5' - TCGTAGGAGTAGTGAAAGGCC - 3'  |
| shRen4 antisense | 5' - GCCTGACATCGAGGAGGATAT - 3'  |
| shRen4 sense     | 5' - ATATCCTCCTCGATGTCAGGC - 3'  |
| miR-122          | 5' - CAAACACCATTGTCACACTCCA - 3' |
| miR-122*         | 5' - TATTTAGTGTGATAATGGCGTT - 3' |
| RNU6-1           | 5' - TGTGCTGCCGAAGCGAGCAC - 3'   |
